# Supplementary material for: Serum Levels of miR-122-5p and miR-125a-5p Predict Hepatotoxicity Occurrence in Patients Undergoing Autologous Hematopoietic Stem Cell Transplantation
Source: MDPI journal article supplement (doi:10.3390/ijms25084355), 2024-04-15
Supplement: s1 [file s1]

**Supplementary Table S1.** Multivariate logistic regression analysis for hepatic toxicity (HT) during hospitalization after ASCT—Results in multiple myeloma patients only.

| Variable             | Value       | OR               | 95% CI<br>Lower | 95% CI<br>Upper | p-Value |
|----------------------|-------------|------------------|-----------------|-----------------|---------|
| Sex                  | Male        | <i>Reference</i> |                 |                 | 0.2695  |
|                      | Female      | 2.29             | 0.53            | 10.02           |         |
| Age at ASCT          | <60 years   | <i>Reference</i> |                 |                 | 0.1043  |
|                      | ≥60 years   | 0.27             | 0.05            | 1.32            |         |
| hsa-miR-122-5p       | 1 dCt       | 2.35             | 1.28            | 4.32            | 0.0058  |
| hsa-miR-125a-5p      | 1 dCt       | 0.17             | 0.04            | 0.82            | 0.0269  |
| Conditioning regimen | Mel-200     | <i>Reference</i> |                 |                 | 0.4628  |
|                      | Mel-reduced | 0.52             | 0.09            | 2.95            |         |
