# Supplementary material for: Serum Levels of miR-122-5p and miR-125a-5p Predict Hepatotoxicity Occurrence in Patients Undergoing Autologous Hematopoietic Stem Cell Transplantation
Source: Int J Mol Sci. 2024 Apr 15;25(8):4355. doi: 10.3390/ijms25084355 (PMC11050045; doi:10.3390/ijms25084355)
Supplement: Supplementary file 1 [file ijms-25-04355-s001.zip]

Archive with 7 entries (7 files):
- Captions of Supplementary Materials.pdf
- Supplementary Figure S1.png
- Supplementary Figure S2.png
- Supplementary Figure S3.tiff
- Supplementary File S1.xls
- Supplementary File S2.csv
- Supplementary Table S1.pdf
