# Supplementary material for: Serum Levels of miR-122-5p and miR-125a-5p Predict Hepatotoxicity Occurrence in Patients Undergoing Autologous Hematopoietic Stem Cell Transplantation
Source: Int J Mol Sci. 2024 Apr 15;25(8):4355. doi: 10.3390/ijms25084355 (PMC11050045; doi:10.3390/ijms25084355)
Supplement: Supplementary file 1 [file ijms-25-04355-s001.zip › Supplementary File S1.xls]

## Sheet: hepatotoxicity suppl
hsa-miR-125a-5p	hsa-miR-99b-5p	hsa-miR-122-5p	hsa-miR-122-3p	hsa-miR-15b-5p	Diagnosis	MM=1 Lymphoma=0	Age at ASCT	Hepatotoxicity
-4.1787	-5.2349	-0.500992	-8.74384	-0.989638	ALCL	0	59.811	1
-3.07864	-5.6466	0.0059702	-7.29667	-0.942525	HL	0	49.1233	1
-1.75365	-4.56776	-0.532904	-5.49753	-0.00129077	DLBCL	0	58.9808	0
-3.14407	-5.28603	-1.66067	-5.81349	-0.00326031	DLBCL	0	47.4219	0
-2.47741	-4.78228	-1.18062	-5.32303	-0.433103	MCL	0	45.0082	0
-3.6529	-4.94483	-3.45704	-8.73022	-0.753329	HL	0	39.5288	1
-1.0712	-3.94964	-1.3887	-7.26167	-0.883415	HL	0	33.6055	0
-4.20142	-5.74843	0.335213	-5.74843	0.228828	HL	0	54.063	0
-3.87629	-6.2655	-1.65994	-9.28722	-0.728506	HL	0	26.3973	1
-2.83481	-5.79917	-0.609163	-7.31735	-0.232892	MCL	0	44.9863	1
-1.45377	-4.79613	1.49567	-6.86206	-0.3312	AITL	0	42.6877	1
-2.49362	-4.87951	-0.0325066	-6.66918	-0.0237832	HL	0	29.2603	1
-1.02939	-3.97591	0.841156	-4.32237	0.0752333	MCL	0	51.9288	0
-1.26575	-4.49662	-1.90866	-7.07695	0.14113	HL	0	53.0274	0
-0.982037	-4.16949	0.965429	-4.16949	0.76739	HL	0	48.9342	1
-1.89061	-3.50304	-1.51191	-5.12124	0.0590349	MCL	0	65.0603	0
-2.69125	-4.9215	-0.38616	-7.76967	-0.334299	MM	1	59.3178	1
-2.60513	-4.59901	-1.70111	-9.4082	-0.859527	MM	1	35.4603	0
-2.0211	-3.44011	1.58643	-3.47697	0.180907	MM	1	64.7534	1
-3.07299	-5.08213	-2.34683	-7.1814	-0.0969449	MM	1	62.3425	0
-3.60652	-4.79574	0.0236129	-7.61899	-0.730207	MM	1	58.1671	1
-2.77298	-5.7573	-0.372436	-6.10622	0.471956	MM	1	65.0411	0
-4.85175	-6.8779	-1.40321	-10.0403	-0.621969	MM	1	55.9315	1
-2.39368	-5.10868	-2.42457	-6.77916	0.656204	MM	1	62.1534	1
-3.80306	-4.37197	-1.94636	-6.89507	0.62393	MM	1	66.863	0
-2.9081	-4.91195	-0.974675	-7.62088	0.0505755	MM	1	64.4329	0
-3.11566	-6.7696	-1.92339	-7.75265	-0.108216	MM	1	45	0
-3.41804	-6.65084	-1.92807	-8.1452	-0.707592	MM	1	65.011	0
-3.26311	-6.33813	-2.04373	-8.58505	0.308133	MM	1	36.3616	1
-2.73144	-5.08188	-1.18735	-7.96705	-0.916002	MM	1	51.5342	1
-1.45377	-4.79613	1.49567	-6.86206	-0.3312	MM	1	55.1726	0
-2.99026	-4.92462	-2.06062	-7.86337	0.105129	MM	1	55.2877	0
-2.2889	-4.36952	-2.92437	-8.44546	-1.00307	MM	1	37.1863	0
-2.07152	-5.03133	-0.226194	-7.94508	0.146347	MM	1	53.3315	0
-1.6118	-4.7417	0.369384	-4.7417	0.61038	MM	1	64.9315	0
-2.93262	-5.54043	-2.3517	-8.19221	-0.0482849	MM	1	59.7616	1
-2.93309	-4.80809	-1.22893	-6.93117	0.15328	MM	1	66.663	0
-2.34847	-4.77243	0.464011	-6.26173	-0.420526	MM	1	58.7425	0
-2.5616	-5.28883	-1.87774	-6.90602	-0.698945	MM	1	60.7671	0
-2.81075	-5.78989	-1.14449	-8.93114	0.249966	MM	1	53.7808	0
-3.08013	-4.30389	1.25072	-4.65281	0.373019	MM	1	50.2877	1
-2.65546	-5.96887	0.860376	-6.64874	0.469119	MM	1	61.2274	0
-2.44049	-3.47585	1.28072	-4.34167	-0.460505	MM	1	60.0603	1
-2.86383	-4.92928	1.09064	-6.85232	-0.183059	MM	1	54.9288	0
-2.63343	-4.17746	-3.2061	-6.30054	0.42121	MM	1	61.3616	0
-2.64393	-4.5899	2.93019	-6.65471	-0.73511	MM	1	67.0384	1
-2.53299	-4.17847	0.536216	-8.41214	0.131305	MM	1	49.389	1
-3.61205	-5.26162	-1.80514	-8.74693	-0.311895	MM	1	65.5589	0
-3.02588	-5.56483	-1.72256	-8.65481	0.295646	MM	1	64.7041	0
-3.39639	-5.139	-0.843827	-8.06019	-0.514596	MM	1	70.1781	0
-3.86602	-5.60169	-2.71734	-9.05366	0.426528	MM	1	68.6712	0
-2.93296	-4.78697	1.74365	-7.33396	0.270682	MM	1	66.5233	1
-3.19088	-4.96159	-1.71411	-8.72099	-0.512063	MM	1	55.211	0
-3.07326	-5.22844	-0.528658	-7.49688	-0.352419	MM	1	71.8904	0
-3.36463	-5.64768	-2.6393	-9.18062	0.366381	MM	1	42.4	1
-1.84128	-4.07187	0.00319814	-6.28545	0.6272	MM	1	68.8438	0
-2.95503	-5.76973	0.935576	-6.46866	0.568073	MM	1	48.863	1
-2.86383	-4.92928	1.09064	-6.85232	-0.183059	MM	1	65.7288	1
-1.33495	-3.55751	-1.86191	-5.63831	-0.50795	MM	1	69.5288	0
-1.733	-3.4357	-4.03152	-6.97341	0.564422	MM	1	66.4027	0
-3.3718	-4.50228	-1.27667	-5.79659	0.0995423	MM	1	70.4959	0
-2.29438	-4.73478	-0.502545	-6.77212	0.298015	MM	1	66.7562	0
-4.72174	-6.50863	0.0213663	-8.37927	-1.40935	MM	1	64.8384	1
-1.81631	-3.87083	1.31938	-5.60334	-0.0555939	MM	1	46.0137	0
-1.56107	-3.70979	-2.22981	-6.54197	0.0205304	MM	1	45	0
-3.77626	-6.19482	-1.31254	-7.41234	-0.489198	MM	1	45	0
