# Supplementary material for: Serum Levels of miR-122-5p and miR-125a-5p Predict Hepatotoxicity Occurrence in Patients Undergoing Autologous Hematopoietic Stem Cell Transplantation
Source: Int J Mol Sci. 2024 Apr 15;25(8):4355. doi: 10.3390/ijms25084355 (PMC11050045; doi:10.3390/ijms25084355)
Supplement: Supplementary file 1 [file ijms-25-04355-s001.zip › Supplementary File S2.csv]

ID	Accession	Target	TargetID	Experiment	Literature	Tissue
hsa-mir-122-5p	MIMAT0000421	A2M	2	Microarray	17612493	Unspecified
hsa-mir-122-5p	MIMAT0000421	ABCF1	23	HITS-CLIP//PAR-CLIP	22012620|21572407	Unspecified
hsa-mir-122-5p	MIMAT0000421	ABL2	27	HITS-CLIP	24906430	Unspecified
hsa-mir-122-5p	MIMAT0000421	ADAM10	102	Immunohistochemistry//Luciferase reporter assay//qRT-PCR//Western blot	19726678|25318895	Unspecified
hsa-mir-122-5p	MIMAT0000421	ADCY2	108	HITS-CLIP	23824327	Unspecified
hsa-mir-122-5p	MIMAT0000421	GRK3	157	HITS-CLIP	23824327|22927820	Unspecified
hsa-mir-122-5p	MIMAT0000421	ALDOA	226	Luciferase reporter assay//Northern blot//qRT-PCR	19296470|18073344	Unspecified
hsa-mir-122-5p	MIMAT0000421	ALOX5AP	241	PAR-CLIP	27292025	Unspecified
hsa-mir-122-5p	MIMAT0000421	ANG	283	HITS-CLIP	24906430	Unspecified
hsa-mir-122-5p	MIMAT0000421	ANK2	287	Luciferase reporter assay//qRT-PCR	19296470	Unspecified
hsa-mir-122-5p	MIMAT0000421	ANXA7	310	Proteomics	21750653	Unspecified
hsa-mir-122-5p	MIMAT0000421	ANXA11	311	Luciferase reporter assay//Microarray//qRT-PCR	19296470	Unspecified
hsa-mir-122-5p	MIMAT0000421	XIAP	331	HITS-CLIP	23824327	Unspecified
hsa-mir-122-5p	MIMAT0000421	BIRC5	332	PAR-CLIP	23446348|21572407|20371350	Unspecified
hsa-mir-122-5p	MIMAT0000421	RHOA	387	Luciferase reporter assay	19617899|19935707	Unspecified
hsa-mir-122-5p	MIMAT0000421	PHOX2A	401	Microarray	19296470	Unspecified
hsa-mir-122-5p	MIMAT0000421	ARL2	402	PAR-CLIP	26701625	Unspecified
hsa-mir-122-5p	MIMAT0000421	ARSA	410	PAR-CLIP	27292025	Unspecified
hsa-mir-122-5p	MIMAT0000421	ARSB	411	Microarray	17612493	Unspecified
hsa-mir-122-5p	MIMAT0000421	ART3	419	Microarray	17612493	Unspecified
hsa-mir-122-5p	MIMAT0000421	ATP1A2	477	Luciferase reporter assay//qRT-PCR	19296470	Unspecified
hsa-mir-122-5p	MIMAT0000421	ATP7A	538	Microarray	17612493	Unspecified
hsa-mir-122-5p	MIMAT0000421	AXL	558	Luciferase reporter assay	24113455	Unspecified
hsa-mir-122-5p	MIMAT0000421	BAX	581	Microarray//Western blot	17612493|18692484	Unspecified
hsa-mir-122-5p	MIMAT0000421	BCL2L1	598	qRT-PCR//Western blot	18692484	Unspecified
hsa-mir-122-5p	MIMAT0000421	BCL2L2	599	Immunohistochemistry//Luciferase reporter assay//Microarray//qRT-PCR//Reporter assay//Western blot	18692484|24121065|27415790	Unspecified
hsa-mir-122-5p	MIMAT0000421	BPGM	669	Microarray	17612493	Unspecified
hsa-mir-122-5p	MIMAT0000421	BRCA2	675	Microarray	17612493	Unspecified
hsa-mir-122-5p	MIMAT0000421	C3	718	HITS-CLIP	23824327	Unspecified
hsa-mir-122-5p	MIMAT0000421	CALD1	800	Proteomics	21750653	Unspecified
hsa-mir-122-5p	MIMAT0000421	CALM3	808	PAR-CLIP	26701625	Unspecified
hsa-mir-122-5p	MIMAT0000421	CALR	811	Proteomics	21750653	Unspecified
hsa-mir-122-5p	MIMAT0000421	CALU	813	Proteomics	21750653	Unspecified
hsa-mir-122-5p	MIMAT0000421	CASP7	840	Microarray	17612493	Unspecified
hsa-mir-122-5p	MIMAT0000421	CCNG1	900	qRT-PCR//Reporter assay//Western blot	17616664|19584283|23126531|18692484|27528885	Unspecified
hsa-mir-122-5p	MIMAT0000421	SIGLEC6	946	PAR-CLIP	27292025	Unspecified
hsa-mir-122-5p	MIMAT0000421	ENTPD1	953	HITS-CLIP	23824327	Unspecified
hsa-mir-122-5p	MIMAT0000421	CDK4	1019	HITS-CLIP//Reporter assay	21750653|23824327	Unspecified
hsa-mir-122-5p	MIMAT0000421	CENPF	1063	Proteomics	21750653	Unspecified
hsa-mir-122-5p	MIMAT0000421	CEACAM8	1088	Microarray	17612493	Unspecified
hsa-mir-122-5p	MIMAT0000421	AP1S1	1174	PAR-CLIP	21572407	Unspecified
hsa-mir-122-5p	MIMAT0000421	CCR6	1235	HITS-CLIP	23824327	Unspecified
hsa-mir-122-5p	MIMAT0000421	CNN3	1266	Proteomics	21750653	Unspecified
hsa-mir-122-5p	MIMAT0000421	COL13A1	1305	HITS-CLIP	21572407	Unspecified
hsa-mir-122-5p	MIMAT0000421	COPA	1314	PAR-CLIP	23446348	Unspecified
hsa-mir-122-5p	MIMAT0000421	SLC31A1	1317	HITS-CLIP	23824327	Unspecified
hsa-mir-122-5p	MIMAT0000421	CPA3	1359	Microarray	17612493	Unspecified
hsa-mir-122-5p	MIMAT0000421	CREB1	1385	Luciferase reporter assay//Microarray//qRT-PCR//Western blot	17612493|28337380	Unspecified
hsa-mir-122-5p	MIMAT0000421	CS	1431	PAR-CLIP	23592263	Unspecified
hsa-mir-122-5p	MIMAT0000421	CSRP1	1465	Microarray	17612493	Unspecified
hsa-mir-122-5p	MIMAT0000421	CTPS1	1503	Microarray	17612493	Unspecified
hsa-mir-122-5p	MIMAT0000421	CYP3A5	1577	PAR-CLIP	22100165	Unspecified
hsa-mir-122-5p	MIMAT0000421	CYP7A1	1581	Luciferase reporter assay//qRT-PCR	20351063	Unspecified
hsa-mir-122-5p	MIMAT0000421	DBT	1629	PAR-CLIP	27292025	Unspecified
hsa-mir-122-5p	MIMAT0000421	DMXL1	1657	Microarray	17612493	Unspecified
hsa-mir-122-5p	MIMAT0000421	DYNC1H1	1778	Microarray	17612493	Unspecified
hsa-mir-122-5p	MIMAT0000421	DUSP2	1844	Luciferase reporter assay//qRT-PCR	19296470	Unspecified
hsa-mir-122-5p	MIMAT0000421	ECE1	1889	PAR-CLIP	27292025	Unspecified
hsa-mir-122-5p	MIMAT0000421	EGFR	1956	Luciferase reporter assay//qRT-PCR//Western blot	28641303	Unspecified
hsa-mir-122-5p	MIMAT0000421	EYA4	2070	Microarray	17612493	Unspecified
hsa-mir-122-5p	MIMAT0000421	F2	2147	HITS-CLIP	23824327	Unspecified
hsa-mir-122-5p	MIMAT0000421	F2RL1	2150	HITS-CLIP	23824327	Unspecified
hsa-mir-122-5p	MIMAT0000421	FANCC	2176	HITS-CLIP	21572407	Unspecified
hsa-mir-122-5p	MIMAT0000421	FHL2	2274	PAR-CLIP	23592263|23446348	Unspecified
hsa-mir-122-5p	MIMAT0000421	FUT8	2530	Luciferase reporter assay//qRT-PCR//Western blot	24130780	Unspecified
hsa-mir-122-5p	MIMAT0000421	G6PC	2538	PAR-CLIP	23592263	Unspecified
hsa-mir-122-5p	MIMAT0000421	GALNT3	2591	PAR-CLIP	22012620	Unspecified
hsa-mir-122-5p	MIMAT0000421	GFPT1	2673	HITS-CLIP	27418678	Unspecified
hsa-mir-122-5p	MIMAT0000421	B4GALT1	2683	Microarray	17612493	Unspecified
hsa-mir-122-5p	MIMAT0000421	GLUL	2752	PAR-CLIP	23446348	Unspecified
hsa-mir-122-5p	MIMAT0000421	GP2	2813	HITS-CLIP//PAR-CLIP	23824327|27292025	Unspecified
hsa-mir-122-5p	MIMAT0000421	FFAR1	2864	PAR-CLIP	27292025	Unspecified
hsa-mir-122-5p	MIMAT0000421	GRSF1	2926	PAR-CLIP	27292025	Unspecified
hsa-mir-122-5p	MIMAT0000421	GSTM3	2947	Proteomics	21750653	Unspecified
hsa-mir-122-5p	MIMAT0000421	GTF2B	2959	qRT-PCR	18073344	Unspecified
hsa-mir-122-5p	MIMAT0000421	GTF2F1	2962	PAR-CLIP	23446348	Unspecified
hsa-mir-122-5p	MIMAT0000421	GTF2H2	2966	Microarray	17612493	Unspecified
hsa-mir-122-5p	MIMAT0000421	GYS1	2997	Microarray//Northern blot//qRT-PCR//Western blot	18073344|17612493	Unspecified
hsa-mir-122-5p	MIMAT0000421	H1F0	3005	PAR-CLIP	26701625	Unspecified
hsa-mir-122-5p	MIMAT0000421	HCCS	3052	Proteomics	21750653	Unspecified
hsa-mir-122-5p	MIMAT0000421	UBE2K	3093	Proteomics	21750653	Unspecified
hsa-mir-122-5p	MIMAT0000421	HLA-DQA1	3117	Microarray	17612493	Unspecified
hsa-mir-122-5p	MIMAT0000421	HLA-E	3133	HITS-CLIP	23824327	Unspecified
hsa-mir-122-5p	MIMAT0000421	HMOX1	3162	Microarray//qRT-PCR//Western blot	20633528|17612493	Unspecified
hsa-mir-122-5p	MIMAT0000421	DNAJB1	3337	Microarray	17612493	Unspecified
hsa-mir-122-5p	MIMAT0000421	IDS	3423	HITS-CLIP//Microarray	17612493|24906430	Unspecified
hsa-mir-122-5p	MIMAT0000421	IFNA1	3439	Microarray	17612493	Unspecified
hsa-mir-122-5p	MIMAT0000421	IFNAR2	3455	HITS-CLIP	19536157	Unspecified
hsa-mir-122-5p	MIMAT0000421	IGF1R	3480	Luciferase reporter assay//qRT-PCR//Reporter assay//Western blot	19726678|23056576|20884628	Unspecified
hsa-mir-122-5p	MIMAT0000421	IL1A	3552	Luciferase reporter assay//qRT-PCR//Western blot	26239639	Unspecified
hsa-mir-122-5p	MIMAT0000421	IL2RA	3559	HITS-CLIP	23824327	Unspecified
hsa-mir-122-5p	MIMAT0000421	FOXK2	3607	Microarray//PAR-CLIP	17612493|23592263	Unspecified
hsa-mir-122-5p	MIMAT0000421	KCNA7	3743	HITS-CLIP	23313552	Unspecified
hsa-mir-122-5p	MIMAT0000421	KRT10	3858	Proteomics	21750653	Unspecified
hsa-mir-122-5p	MIMAT0000421	KRT14	3861	Microarray	17612493	Unspecified
hsa-mir-122-5p	MIMAT0000421	KRT18	3875	Proteomics	17612493	Unspecified
hsa-mir-122-5p	MIMAT0000421	LAMP1	3916	Microarray	17612493	Unspecified
hsa-mir-122-5p	MIMAT0000421	ABLIM1	3983	Microarray	17612493	Unspecified
hsa-mir-122-5p	MIMAT0000421	LIMS1	3987	HITS-CLIP	23824327	Unspecified
hsa-mir-122-5p	MIMAT0000421	LRP3	4037	PAR-CLIP	23592263	Unspecified
hsa-mir-122-5p	MIMAT0000421	LYN	4067	PAR-CLIP	27292025	Unspecified
hsa-mir-122-5p	MIMAT0000421	MARCKS	4082	Microarray	17612493	Unspecified
hsa-mir-122-5p	MIMAT0000421	MAFG	4097	PAR-CLIP	26701625	Unspecified
hsa-mir-122-5p	MIMAT0000421	MAZ	4150	Microarray	17612493	Unspecified
hsa-mir-122-5p	MIMAT0000421	MCAM	4162	PAR-CLIP	23446348|22012620	Unspecified
hsa-mir-122-5p	MIMAT0000421	MDM4	4194	PAR-CLIP	23592263	Unspecified
hsa-mir-122-5p	MIMAT0000421	MECP2	4204	Luciferase reporter assay//qRT-PCR	19296470	Unspecified
hsa-mir-122-5p	MIMAT0000421	MEF2D	4209	Luciferase reporter assay	24390737|27109478	Unspecified
hsa-mir-122-5p	MIMAT0000421	MGAT1	4245	PAR-CLIP	27292025	Unspecified
hsa-mir-122-5p	MIMAT0000421	MKLN1	4289	HITS-CLIP	23824327	Unspecified
hsa-mir-122-5p	MIMAT0000421	MPV17	4358	Microarray	17612493	Unspecified
hsa-mir-122-5p	MIMAT0000421	MSN	4478	PAR-CLIP	26701625	Unspecified
hsa-mir-122-5p	MIMAT0000421	MTAP	4507	HITS-CLIP	23824327	Unspecified
hsa-mir-122-5p	MIMAT0000421	MYH11	4629	HITS-CLIP	23824327	Unspecified
hsa-mir-122-5p	MIMAT0000421	NARS	4677	HITS-CLIP	23824327	Unspecified
hsa-mir-122-5p	MIMAT0000421	NASP	4678	HITS-CLIP	23313552	Unspecified
hsa-mir-122-5p	MIMAT0000421	NCAM1	4684	Luciferase reporter assay//Microarray//qRT-PCR	19296470|17179747|17612493	Unspecified
hsa-mir-122-5p	MIMAT0000421	NFE2L1	4779	HITS-CLIP//PAR-CLIP	23824327|26701625	Unspecified
hsa-mir-122-5p	MIMAT0000421	NFX1	4799	HITS-CLIP	23824327|23313552	Unspecified
hsa-mir-122-5p	MIMAT0000421	NODAL	4838	Microarray	17612493	Unspecified
hsa-mir-122-5p	MIMAT0000421	SLC11A2	4891	Microarray	17612493	Unspecified
hsa-mir-122-5p	MIMAT0000421	OMD	4958	HITS-CLIP	23824327	Unspecified
hsa-mir-122-5p	MIMAT0000421	OLR1	4973	PAR-CLIP	23592263	Unspecified
hsa-mir-122-5p	MIMAT0000421	ORC2	4999	Microarray	17612493	Unspecified
hsa-mir-122-5p	MIMAT0000421	P4HA1	5033	Luciferase reporter assay	23178710	Unspecified
hsa-mir-122-5p	MIMAT0000421	PAK1	5058	Microarray	17612493	Unspecified
hsa-mir-122-5p	MIMAT0000421	PDK4	5166	Luciferase reporter assay//qRT-PCR//Western blot	26506419	Unspecified
hsa-mir-122-5p	MIMAT0000421	PFDN1	5201	Microarray	17612493	Unspecified
hsa-mir-122-5p	MIMAT0000421	PFKFB2	5208	Microarray	17612493	Unspecified
hsa-mir-122-5p	MIMAT0000421	PHKA1	5255	Microarray	17612493	Unspecified
hsa-mir-122-5p	MIMAT0000421	PIK3R2	5296	PAR-CLIP	27292025	Unspecified
hsa-mir-122-5p	MIMAT0000421	PIP4K2A	5305	Microarray	17612493	Unspecified
hsa-mir-122-5p	MIMAT0000421	PKM	5315	Luciferase reporter assay//Microarray//PAR-CLIP//qRT-PCR//Western blot	17612493|24466275|23592263	Unspecified
hsa-mir-122-5p	MIMAT0000421	PKNOX1	5316	PAR-CLIP	20371350	Unspecified
hsa-mir-122-5p	MIMAT0000421	PLAGL2	5326	Microarray	17612493	Unspecified
hsa-mir-122-5p	MIMAT0000421	PMP22	5376	Microarray	17612493	Unspecified
hsa-mir-122-5p	MIMAT0000421	POLR2D	5433	HITS-CLIP	23824327	Unspecified
hsa-mir-122-5p	MIMAT0000421	PPIC	5480	PAR-CLIP	21572407|27292025	Unspecified
hsa-mir-122-5p	MIMAT0000421	PRKAB1	5564	Luciferase reporter assay	16459310	Unspecified
hsa-mir-122-5p	MIMAT0000421	MAPK1	5594	HITS-CLIP	23824327	Unspecified
hsa-mir-122-5p	MIMAT0000421	MAPK11	5600	Luciferase reporter assay//qRT-PCR	19296470	Unspecified
hsa-mir-122-5p	MIMAT0000421	PSMB5	5693	HITS-CLIP	23824327	Unspecified
hsa-mir-122-5p	MIMAT0000421	PSMD10	5716	Proteomics	21750653	Unspecified
hsa-mir-122-5p	MIMAT0000421	PSPH	5723	Proteomics	21750653	Unspecified
hsa-mir-122-5p	MIMAT0000421	QSOX1	5768	PAR-CLIP	27292025	Unspecified
hsa-mir-122-5p	MIMAT0000421	PTPN1	5770	Luciferase reporter assay	22807119	Unspecified
hsa-mir-122-5p	MIMAT0000421	PTPN2	5771	HITS-CLIP	27418678	Unspecified
hsa-mir-122-5p	MIMAT0000421	MAP4K2	5871	HITS-CLIP	23824327	Unspecified
hsa-mir-122-5p	MIMAT0000421	RAC1	5879	//Luciferase reporter assay//Microarray//qRT-PCR//Western blot	19935707|26540468	Unspecified
hsa-mir-122-5p	MIMAT0000421	RAD21	5885	PAR-CLIP	23592263|23446348|20371350	Unspecified
hsa-mir-122-5p	MIMAT0000421	RBBP5	5929	Microarray	17612493	Unspecified
hsa-mir-122-5p	MIMAT0000421	RBL1	5933	HITS-CLIP	23824327	Unspecified
hsa-mir-122-5p	MIMAT0000421	REL	5966	PAR-CLIP	23592263|23446348|21572407	Unspecified
hsa-mir-122-5p	MIMAT0000421	RFC2	5982	HITS-CLIP	23824327	Unspecified
hsa-mir-122-5p	MIMAT0000421	RPS15A	6210	HITS-CLIP	23824327	Unspecified
hsa-mir-122-5p	MIMAT0000421	CLEC11A	6320	Microarray	17612493	Unspecified
hsa-mir-122-5p	MIMAT0000421	SCN4B	6330	Microarray	17612493	Unspecified
hsa-mir-122-5p	MIMAT0000421	SET	6418	Proteomics	21750653	Unspecified
hsa-mir-122-5p	MIMAT0000421	SH3GL1	6455	PAR-CLIP	26701625	Unspecified
hsa-mir-122-5p	MIMAT0000421	ST3GAL1	6482	HITS-CLIP	21572407	Unspecified
hsa-mir-122-5p	MIMAT0000421	SLC1A5	6510	HITS-CLIP	23824327	Unspecified
hsa-mir-122-5p	MIMAT0000421	SLC2A3	6515	PAR-CLIP	23446348|21572407	Unspecified
hsa-mir-122-5p	MIMAT0000421	SLC4A1	6521	PAR-CLIP	22012620	Unspecified
hsa-mir-122-5p	MIMAT0000421	SLC7A1	6541	Luciferase reporter assay//Northern blot//qRT-PCR//Reporter assay//Western blot	17179747|19296470|18073344|16777601	Unspecified
hsa-mir-122-5p	MIMAT0000421	SLC9A1	6548	Microarray//PAR-CLIP	17612493|23592263	Unspecified
hsa-mir-122-5p	MIMAT0000421	SLC15A2	6565	Microarray	17612493	Unspecified
hsa-mir-122-5p	MIMAT0000421	SNTB2	6645	HITS-CLIP	23824327	Unspecified
hsa-mir-122-5p	MIMAT0000421	SOX2	6657	Microarray	17612493	Unspecified
hsa-mir-122-5p	MIMAT0000421	SPIB	6689	HITS-CLIP	23824327	Unspecified
hsa-mir-122-5p	MIMAT0000421	SRF	6722	Luciferase reporter assay//qRT-PCR//Western blot	19726678	Unspecified
hsa-mir-122-5p	MIMAT0000421	SSR3	6747	Microarray	17612493	Unspecified
hsa-mir-122-5p	MIMAT0000421	SSTR2	6752	HITS-CLIP	23824327	Unspecified
hsa-mir-122-5p	MIMAT0000421	STXBP2	6813	HITS-CLIP	23824327	Unspecified
hsa-mir-122-5p	MIMAT0000421	ADAM17	6868	Luciferase reporter assay//qRT-PCR	19296470|19726678|19935707	Unspecified
hsa-mir-122-5p	MIMAT0000421	TCP11	6954	Microarray	17612493	Unspecified
hsa-mir-122-5p	MIMAT0000421	TEP1	7011	HITS-CLIP	23824327	Unspecified
hsa-mir-122-5p	MIMAT0000421	TERF2	7014	HITS-CLIP	23824327	Unspecified
hsa-mir-122-5p	MIMAT0000421	TFDP2	7029	PAR-CLIP	27292025	Unspecified
hsa-mir-122-5p	MIMAT0000421	TGFB1	7040	qRT-PCR	24168656	Unspecified
hsa-mir-122-5p	MIMAT0000421	TIAL1	7073	HITS-CLIP	23824327	Unspecified
hsa-mir-122-5p	MIMAT0000421	TPD52L2	7165	Luciferase reporter assay//Microarray//qRT-PCR	19296470|18073344	Unspecified
hsa-mir-122-5p	MIMAT0000421	UBE2G2	7327	HITS-CLIP	27418678	Unspecified
hsa-mir-122-5p	MIMAT0000421	UBE2L3	7332	Microarray	17612493	Unspecified
hsa-mir-122-5p	MIMAT0000421	SUMO1	7341	PAR-CLIP	23592263	Unspecified
hsa-mir-122-5p	MIMAT0000421	UBTF	7343	PAR-CLIP	23592263	Unspecified
hsa-mir-122-5p	MIMAT0000421	UROS	7390	PAR-CLIP	27292025	Unspecified
hsa-mir-122-5p	MIMAT0000421	VDR	7421	PAR-CLIP	27292025	Unspecified
hsa-mir-122-5p	MIMAT0000421	VEGFC	7424	ELISA//Luciferase reporter assay//qRT-PCR//Western blot	27508026	Unspecified
hsa-mir-122-5p	MIMAT0000421	VHL	7428	Microarray	17612493	Unspecified
hsa-mir-122-5p	MIMAT0000421	WNT1	7471	Luciferase reporter assay//qRT-PCR//Western blot	22276989|27687586	Unspecified
hsa-mir-122-5p	MIMAT0000421	YWHAB	7529	HITS-CLIP//PAR-CLIP	22012620|21572407	Unspecified
hsa-mir-122-5p	MIMAT0000421	ZNF74	7625	HITS-CLIP	23824327	Unspecified
hsa-mir-122-5p	MIMAT0000421	ZNF154	7710	PAR-CLIP	27292025	Unspecified
hsa-mir-122-5p	MIMAT0000421	ZNF226	7769	PAR-CLIP	27292025	Unspecified
hsa-mir-122-5p	MIMAT0000421	LUZP1	7798	Microarray	17612493	Unspecified
hsa-mir-122-5p	MIMAT0000421	MAFK	7975	PAR-CLIP	23592263|24398324|20371350|26701625	Unspecified
hsa-mir-122-5p	MIMAT0000421	ARHGEF5	7984	HITS-CLIP	23824327	Unspecified
hsa-mir-122-5p	MIMAT0000421	MLF2	8079	PAR-CLIP	26701625|27292025	Unspecified
hsa-mir-122-5p	MIMAT0000421	SLC7A5	8140	PAR-CLIP	24398324|22012620|26701625	Unspecified
hsa-mir-122-5p	MIMAT0000421	SLC10A3	8273	PAR-CLIP	27292025	Unspecified
hsa-mir-122-5p	MIMAT0000421	IFITM1	8519	PAR-CLIP	27292025	Unspecified
hsa-mir-122-5p	MIMAT0000421	DGKE	8526	HITS-CLIP	23824327	Unspecified
hsa-mir-122-5p	MIMAT0000421	MAPKAPK5	8550	PAR-CLIP	27292025	Unspecified
hsa-mir-122-5p	MIMAT0000421	PRKRA	8575	Luciferase reporter assay//Microarray//qRT-PCR//Western blot	21937511	Unspecified
hsa-mir-122-5p	MIMAT0000421	SOCS1	8651	GFP reporter assay	23348614	Unspecified
hsa-mir-122-5p	MIMAT0000421	PEA15	8682	Microarray	17612493	Unspecified
hsa-mir-122-5p	MIMAT0000421	TNFSF14	8740	PAR-CLIP	23592263	Unspecified
hsa-mir-122-5p	MIMAT0000421	SUCLA2	8803	Microarray	17612493	Unspecified
hsa-mir-122-5p	MIMAT0000421	CDKL1	8814	PAR-CLIP	23592263	Unspecified
hsa-mir-122-5p	MIMAT0000421	WASF1	8936	Microarray	17612493	Unspecified
hsa-mir-122-5p	MIMAT0000421	SPAG9	9043	Microarray	17612493	Unspecified
hsa-mir-122-5p	MIMAT0000421	TBX19	9095	Luciferase reporter assay//qRT-PCR	19296470	Unspecified
hsa-mir-122-5p	MIMAT0000421	USP10	9100	Microarray	17612493	Unspecified
hsa-mir-122-5p	MIMAT0000421	SLC16A5	9121	HITS-CLIP	23824327	Unspecified
hsa-mir-122-5p	MIMAT0000421	LRAT	9227	HITS-CLIP	23824327	Unspecified
hsa-mir-122-5p	MIMAT0000421	RPS6KA5	9252	HITS-CLIP	23824327	Unspecified
hsa-mir-122-5p	MIMAT0000421	NUMBL	9253	Luciferase reporter assay//qRT-PCR	19296470	Unspecified
hsa-mir-122-5p	MIMAT0000421	CD83	9308	Microarray	17612493	Unspecified
hsa-mir-122-5p	MIMAT0000421	EFTUD2	9343	PAR-CLIP	23592263	Unspecified
hsa-mir-122-5p	MIMAT0000421	TGFBRAP1	9392	Microarray	17612493	Unspecified
hsa-mir-122-5p	MIMAT0000421	ZNF264	9422	Microarray	17612493	Unspecified
hsa-mir-122-5p	MIMAT0000421	MED7	9443	HITS-CLIP	19536157	Unspecified
hsa-mir-122-5p	MIMAT0000421	CHST3	9469	Microarray	17612493	Unspecified
hsa-mir-122-5p	MIMAT0000421	AKAP5	9495	PAR-CLIP	27292025	Unspecified
hsa-mir-122-5p	MIMAT0000421	NPEPPS	9520	Microarray	17612493	Unspecified
hsa-mir-122-5p	MIMAT0000421	ENTPD4	9583	Luciferase reporter assay//qRT-PCR	19296470	Unspecified
hsa-mir-122-5p	MIMAT0000421	PHF14	9678	Microarray	17612493	Unspecified
hsa-mir-122-5p	MIMAT0000421	TRAM2	9697	Microarray	17612493	Unspecified
hsa-mir-122-5p	MIMAT0000421	KIAA0100	9703	PAR-CLIP	26701625	Unspecified
hsa-mir-122-5p	MIMAT0000421	PCLAF	9768	Microarray	17612493	Unspecified
hsa-mir-122-5p	MIMAT0000421	BMS1	9790	HITS-CLIP	23824327	Unspecified
hsa-mir-122-5p	MIMAT0000421	IST1	9798	PAR-CLIP	26701625	Unspecified
hsa-mir-122-5p	MIMAT0000421	TOMM70	9868	PAR-CLIP	23446348|22012620|20371350	Unspecified
hsa-mir-122-5p	MIMAT0000421	FIG4	9896	HITS-CLIP	23824327	Unspecified
hsa-mir-122-5p	MIMAT0000421	NCAPD2	9918	PAR-CLIP	23446348|21572407	Unspecified
hsa-mir-122-5p	MIMAT0000421	HS3ST1	9957	HITS-CLIP	23824327	Unspecified
hsa-mir-122-5p	MIMAT0000421	CCS	9973	HITS-CLIP	23824327	Unspecified
hsa-mir-122-5p	MIMAT0000421	AKT3	10000	Immunoblot//Luciferase reporter assay//qRT-PCR	19296470|24244539	Unspecified
hsa-mir-122-5p	MIMAT0000421	ABCF2	10061	HITS-CLIP//PAR-CLIP	24398324|23446348|21572407|20371350|26701625	Unspecified
hsa-mir-122-5p	MIMAT0000421	OPTN	10133	HITS-CLIP	23824327	Unspecified
hsa-mir-122-5p	MIMAT0000421	PRMT3	10196	PAR-CLIP	22291592	Unspecified
hsa-mir-122-5p	MIMAT0000421	TRIB1	10221	Luciferase reporter assay//qRT-PCR	19296470	Unspecified
hsa-mir-122-5p	MIMAT0000421	DCAF7	10238	HITS-CLIP	23824327	Unspecified
hsa-mir-122-5p	MIMAT0000421	CALCOCO2	10241	HITS-CLIP	27418678	Unspecified
hsa-mir-122-5p	MIMAT0000421	SPRY2	10253	Luciferase reporter assay//Microarray//qRT-PCR//Western blot	27943426	Unspecified
hsa-mir-122-5p	MIMAT0000421	FSTL3	10272	Microarray	17612493	Unspecified
hsa-mir-122-5p	MIMAT0000421	PRSS16	10279	PAR-CLIP	20371350	Unspecified
hsa-mir-122-5p	MIMAT0000421	SF3A1	10291	HITS-CLIP	23824327|27418678	Unspecified
hsa-mir-122-5p	MIMAT0000421	SEC23B	10483	HITS-CLIP	23824327	Unspecified
hsa-mir-122-5p	MIMAT0000421	SPTLC1	10558	Microarray	17612493	Unspecified
hsa-mir-122-5p	MIMAT0000421	SLC19A2	10560	Microarray	17612493	Unspecified
hsa-mir-122-5p	MIMAT0000421	CDC42EP3	10602	Microarray	17612493	Unspecified
hsa-mir-122-5p	MIMAT0000421	YKT6	10652	Microarray	17612493	Unspecified
hsa-mir-122-5p	MIMAT0000421	GMEB1	10691	HITS-CLIP	23824327	Unspecified
hsa-mir-122-5p	MIMAT0000421	YME1L1	10730	HITS-CLIP	23824327	Unspecified
hsa-mir-122-5p	MIMAT0000421	KIF1C	10749	HITS-CLIP	23824327	Unspecified
hsa-mir-122-5p	MIMAT0000421	TOB2	10766	Microarray//PAR-CLIP	17612493|23592263|20371350	Unspecified
hsa-mir-122-5p	MIMAT0000421	RAB10	10890	HITS-CLIP	23824327	Unspecified
hsa-mir-122-5p	MIMAT0000421	GPR75	10936	PAR-CLIP	27292025	Unspecified
hsa-mir-122-5p	MIMAT0000421	KDELR1	10945	HITS-CLIP	23824327	Unspecified
hsa-mir-122-5p	MIMAT0000421	AP3M2	10947	Luciferase reporter assay//qRT-PCR	19296470	Unspecified
hsa-mir-122-5p	MIMAT0000421	PNRC1	10957	HITS-CLIP	23824327	Unspecified
hsa-mir-122-5p	MIMAT0000421	ERP29	10961	Proteomics	21750653	Unspecified
hsa-mir-122-5p	MIMAT0000421	LILRA2	11027	HITS-CLIP	23824327	Unspecified
hsa-mir-122-5p	MIMAT0000421	BTN3A2	11118	HITS-CLIP	24906430	Unspecified
hsa-mir-122-5p	MIMAT0000421	KAT7	11143	HITS-CLIP	23824327|19536157	Unspecified
hsa-mir-122-5p	MIMAT0000421	NUDT3	11165	PAR-CLIP	27292025	Unspecified
hsa-mir-122-5p	MIMAT0000421	AKAP11	11215	Microarray	17612493	Unspecified
hsa-mir-122-5p	MIMAT0000421	GALNT6	11226	PAR-CLIP	27292025	Unspecified
hsa-mir-122-5p	MIMAT0000421	PXMP4	11264	HITS-CLIP	23824327	Unspecified
hsa-mir-122-5p	MIMAT0000421	Cux1	13047	qRT-PCR	22815988	Unspecified
hsa-mir-122-5p	MIMAT0000421	HSPA4L	22824	PAR-CLIP	22012620	Unspecified
hsa-mir-122-5p	MIMAT0000421	SLITRK3	22865	HITS-CLIP	27418678	Unspecified
hsa-mir-122-5p	MIMAT0000421	MLXIP	22877	PAR-CLIP	27292025	Unspecified
hsa-mir-122-5p	MIMAT0000421	FOXJ3	22887	Luciferase reporter assay//qRT-PCR	19296470	Unspecified
hsa-mir-122-5p	MIMAT0000421	MAPRE1	22919	Microarray	17612493	Unspecified
hsa-mir-122-5p	MIMAT0000421	POMZP3	22932	Microarray	17612493	Unspecified
hsa-mir-122-5p	MIMAT0000421	FBXO21	23014	PAR-CLIP	23592263	Unspecified
hsa-mir-122-5p	MIMAT0000421	UNC13A	23025	HITS-CLIP	23824327	Unspecified
hsa-mir-122-5p	MIMAT0000421	SMG1	23049	HITS-CLIP	23824327	Unspecified
hsa-mir-122-5p	MIMAT0000421	NMNAT2	23057	Microarray	17612493	Unspecified
hsa-mir-122-5p	MIMAT0000421	ERC1	23085	PAR-CLIP	21572407	Unspecified
hsa-mir-122-5p	MIMAT0000421	PEG10	23089	Luciferase reporter assay	27370270	Unspecified
hsa-mir-122-5p	MIMAT0000421	CDK19	23097	PAR-CLIP	23446348	Unspecified
hsa-mir-122-5p	MIMAT0000421	NCDN	23154	Microarray	17612493	Unspecified
hsa-mir-122-5p	MIMAT0000421	MPRIP	23164	PAR-CLIP	27292025	Unspecified
hsa-mir-122-5p	MIMAT0000421	TTLL12	23170	HITS-CLIP	27418678	Unspecified
hsa-mir-122-5p	MIMAT0000421	LPIN1	23175	Luciferase reporter assay//qRT-PCR//Western blot	28287811	Unspecified
hsa-mir-122-5p	MIMAT0000421	XPO6	23214	Luciferase reporter assay//qRT-PCR	19296470	Unspecified
hsa-mir-122-5p	MIMAT0000421	SIK2	23235	HITS-CLIP	23824327	Unspecified
hsa-mir-122-5p	MIMAT0000421	WWC1	23286	HITS-CLIP	23824327	Unspecified
hsa-mir-122-5p	MIMAT0000421	CTDNEP1	23399	Luciferase reporter assay//qRT-PCR//Western blot	28287811	Unspecified
hsa-mir-122-5p	MIMAT0000421	GPR161	23432	PAR-CLIP	27292025	Unspecified
hsa-mir-122-5p	MIMAT0000421	SLC44A1	23446	Microarray	17612493	Unspecified
hsa-mir-122-5p	MIMAT0000421	ABCA6	23460	HITS-CLIP	23824327	Unspecified
hsa-mir-122-5p	MIMAT0000421	QPRT	23475	HITS-CLIP	23824327	Unspecified
hsa-mir-122-5p	MIMAT0000421	POFUT1	23509	Microarray	17612493	Unspecified
hsa-mir-122-5p	MIMAT0000421	ZNF281	23528	HITS-CLIP	23824327|27418678	Unspecified
hsa-mir-122-5p	MIMAT0000421	DNPEP	23549	HITS-CLIP	23824327	Unspecified
hsa-mir-122-5p	MIMAT0000421	HEBP2	23593	HITS-CLIP	24906430	Unspecified
hsa-mir-122-5p	MIMAT0000421	ORC6	23594	PAR-CLIP	21572407|20371350	Unspecified
hsa-mir-122-5p	MIMAT0000421	ACOT9	23597	HITS-CLIP	22927820	Unspecified
hsa-mir-122-5p	MIMAT0000421	PATZ1	23598	PAR-CLIP	22012620	Unspecified
hsa-mir-122-5p	MIMAT0000421	PHLDA3	23612	HITS-CLIP	24906430	Unspecified
hsa-mir-122-5p	MIMAT0000421	TRIM29	23650	Microarray	17612493	Unspecified
hsa-mir-122-5p	MIMAT0000421	SLC7A11	23657	Luciferase reporter assay//qRT-PCR	19296470	Unspecified
hsa-mir-122-5p	MIMAT0000421	OSBP2	23762	Microarray	17612493	Unspecified
hsa-mir-122-5p	MIMAT0000421	MAFF	23764	HITS-CLIP	21572407	Unspecified
hsa-mir-122-5p	MIMAT0000421	DSTYK	25778	Luciferase reporter assay//qRT-PCR	19296470	Unspecified
hsa-mir-122-5p	MIMAT0000421	FBXO7	25793	Microarray	17612493	Unspecified
hsa-mir-122-5p	MIMAT0000421	BAMBI	25805	HITS-CLIP	23824327	Unspecified
hsa-mir-122-5p	MIMAT0000421	MTO1	25821	HITS-CLIP	23824327	Unspecified
hsa-mir-122-5p	MIMAT0000421	TECPR1	25851	HITS-CLIP	23824327	Unspecified
hsa-mir-122-5p	MIMAT0000421	CLIC4	25932	Luciferase reporter assay//Microarray//PAR-CLIP//qRT-PCR	17612493|21572407|20371350|23793894	Unspecified
hsa-mir-122-5p	MIMAT0000421	HEATR5A	25938	PAR-CLIP	27292025	Unspecified
hsa-mir-122-5p	MIMAT0000421	RAI14	26064	Microarray	20633528	Unspecified
hsa-mir-122-5p	MIMAT0000421	PYGO1	26108	Microarray	17612493	Unspecified
hsa-mir-122-5p	MIMAT0000421	WSB1	26118	PAR-CLIP	23592263	Unspecified
hsa-mir-122-5p	MIMAT0000421	ZNF658	26149	Microarray	17612493	Unspecified
hsa-mir-122-5p	MIMAT0000421	MYCBP	26292	HITS-CLIP//Microarray	17612493|23824327	Unspecified
hsa-mir-122-5p	MIMAT0000421	STAU2	27067	Microarray	17612493	Unspecified
hsa-mir-122-5p	MIMAT0000421	FOXP1	27086	Luciferase reporter assay//qRT-PCR	19296470	Unspecified
hsa-mir-122-5p	MIMAT0000421	ST6GALNAC4	27090	Microarray	17612493	Unspecified
hsa-mir-122-5p	MIMAT0000421	TNRC6A	27327	PAR-CLIP	23446348	Unspecified
hsa-mir-122-5p	MIMAT0000421	RABGEF1	27342	Microarray	17612493	Unspecified
hsa-mir-122-5p	MIMAT0000421	PHPT1	29085	Proteomics	21750653	Unspecified
hsa-mir-122-5p	MIMAT0000421	RACGAP1	29127	PAR-CLIP	27292025	Unspecified
hsa-mir-122-5p	MIMAT0000421	PARVB	29780	HITS-CLIP//PAR-CLIP	22012620|21572407	Unspecified
hsa-mir-122-5p	MIMAT0000421	OLA1	29789	HITS-CLIP	23824327	Unspecified
hsa-mir-122-5p	MIMAT0000421	GPSM2	29899	PAR-CLIP	27292025	Unspecified
hsa-mir-122-5p	MIMAT0000421	EEF2K	29904	PAR-CLIP	27292025	Unspecified
hsa-mir-122-5p	MIMAT0000421	AK3	50808	PAR-CLIP	27292025	Unspecified
hsa-mir-122-5p	MIMAT0000421	HDDC2	51020	PAR-CLIP	21572407	Unspecified
hsa-mir-122-5p	MIMAT0000421	GLOD4	51031	Proteomics	21750653	Unspecified
hsa-mir-122-5p	MIMAT0000421	TUBD1	51174	PAR-CLIP	27292025	Unspecified
hsa-mir-122-5p	MIMAT0000421	ACP6	51205	HITS-CLIP	23824327	Unspecified
hsa-mir-122-5p	MIMAT0000421	NT5C3A	51251	Luciferase reporter assay	23055569	Unspecified
hsa-mir-122-5p	MIMAT0000421	NIP7	51388	HITS-CLIP	23824327	Unspecified
hsa-mir-122-5p	MIMAT0000421	CINP	51550	HITS-CLIP	23824327	Unspecified
hsa-mir-122-5p	MIMAT0000421	RAB6B	51560	Luciferase reporter assay//qRT-PCR	19296470	Unspecified
hsa-mir-122-5p	MIMAT0000421	GDE1	51573	HITS-CLIP	23824327	Unspecified
hsa-mir-122-5p	MIMAT0000421	ESF1	51575	HITS-CLIP	23824327	Unspecified
hsa-mir-122-5p	MIMAT0000421	MRPS23	51649	PAR-CLIP	27292025	Unspecified
hsa-mir-122-5p	MIMAT0000421	MSRB1	51734	PAR-CLIP	27292025	Unspecified
hsa-mir-122-5p	MIMAT0000421	NLGN3	54413	Microarray	17612493	Unspecified
hsa-mir-122-5p	MIMAT0000421	TAS2R5	54429	HITS-CLIP//PAR-CLIP	23824327|27292025	Unspecified
hsa-mir-122-5p	MIMAT0000421	RNF216	54476	HITS-CLIP	21572407	Unspecified
hsa-mir-122-5p	MIMAT0000421	TMCO1	54499	HITS-CLIP	23824327	Unspecified
hsa-mir-122-5p	MIMAT0000421	RBM47	54502	PAR-CLIP	22012620	Unspecified
hsa-mir-122-5p	MIMAT0000421	GNL3L	54552	Microarray	17612493	Unspecified
hsa-mir-122-5p	MIMAT0000421	INO80	54617	HITS-CLIP	23824327	Unspecified
hsa-mir-122-5p	MIMAT0000421	MED18	54797	HITS-CLIP	23824327	Unspecified
hsa-mir-122-5p	MIMAT0000421	PIGG	54872	HITS-CLIP	23824327	Unspecified
hsa-mir-122-5p	MIMAT0000421	ZCCHC2	54877	Microarray	17612493	Unspecified
hsa-mir-122-5p	MIMAT0000421	RHBDL2	54933	HITS-CLIP	24906430	Unspecified
hsa-mir-122-5p	MIMAT0000421	PIGX	54965	HITS-CLIP	27418678	Unspecified
hsa-mir-122-5p	MIMAT0000421	FAM118A	55007	Microarray	17612493	Unspecified
hsa-mir-122-5p	MIMAT0000421	PTCD3	55037	HITS-CLIP	23824327	Unspecified
hsa-mir-122-5p	MIMAT0000421	RBM23	55147	HITS-CLIP	23824327	Unspecified
hsa-mir-122-5p	MIMAT0000421	SBNO1	55206	HITS-CLIP	23824327	Unspecified
hsa-mir-122-5p	MIMAT0000421	VPS53	55275	HITS-CLIP	23824327	Unspecified
hsa-mir-122-5p	MIMAT0000421	C4orf19	55286	PAR-CLIP	27292025	Unspecified
hsa-mir-122-5p	MIMAT0000421	TMEM40	55287	HITS-CLIP	23824327	Unspecified
hsa-mir-122-5p	MIMAT0000421	SPTLC3	55304	HITS-CLIP	19536157	Unspecified
hsa-mir-122-5p	MIMAT0000421	CHDH	55349	HITS-CLIP	23824327	Unspecified
hsa-mir-122-5p	MIMAT0000421	NCBP3	55421	HITS-CLIP	23824327	Unspecified
hsa-mir-122-5p	MIMAT0000421	CHST12	55501	Microarray	17612493	Unspecified
hsa-mir-122-5p	MIMAT0000421	SLC35E3	55508	HITS-CLIP	23824327	Unspecified
hsa-mir-122-5p	MIMAT0000421	RBM38	55544	PAR-CLIP	26701625	Unspecified
hsa-mir-122-5p	MIMAT0000421	GALNT10	55568	Immunohistochemistry//Immunoprecipitaion//In situ hybridization//Luciferase reporter assay//qRT-PCR//Western blot	19296470|25422324	Unspecified
hsa-mir-122-5p	MIMAT0000421	NAGK	55577	HITS-CLIP	23824327	Unspecified
hsa-mir-122-5p	MIMAT0000421	MED29	55588	HITS-CLIP	21572407	Unspecified
hsa-mir-122-5p	MIMAT0000421	ANKRD10	55608	Microarray	17612493	Unspecified
hsa-mir-122-5p	MIMAT0000421	TBC1D22B	55633	Microarray	17612493	Unspecified
hsa-mir-122-5p	MIMAT0000421	MREG	55686	PAR-CLIP	27292025	Unspecified
hsa-mir-122-5p	MIMAT0000421	LUC7L	55692	HITS-CLIP	27418678	Unspecified
hsa-mir-122-5p	MIMAT0000421	HHAT	55733	Microarray	17612493	Unspecified
hsa-mir-122-5p	MIMAT0000421	PRR11	55771	Microarray	17612493	Unspecified
hsa-mir-122-5p	MIMAT0000421	METTL2B	55798	HITS-CLIP	27418678	Unspecified
hsa-mir-122-5p	MIMAT0000421	LRP2BP	55805	HITS-CLIP	27418678	Unspecified
hsa-mir-122-5p	MIMAT0000421	EMC3	55831	PAR-CLIP	27292025	Unspecified
hsa-mir-122-5p	MIMAT0000421	UBAP2	55833	Luciferase reporter assay//qRT-PCR	19296470	Unspecified
hsa-mir-122-5p	MIMAT0000421	ZC3H15	55854	HITS-CLIP	27418678	Unspecified
hsa-mir-122-5p	MIMAT0000421	ZNF395	55893	GFP reporter assay	23221562	Unspecified
hsa-mir-122-5p	MIMAT0000421	KLHL7	55975	PAR-CLIP	27292025	Unspecified
hsa-mir-122-5p	MIMAT0000421	ALG1	56052	HITS-CLIP	23824327	Unspecified
hsa-mir-122-5p	MIMAT0000421	TDRD1	56165	HITS-CLIP	23824327	Unspecified
hsa-mir-122-5p	MIMAT0000421	SAR1A	56681	HITS-CLIP	23706177	Unspecified
hsa-mir-122-5p	MIMAT0000421	KCMF1	56888	HITS-CLIP	23824327	Unspecified
hsa-mir-122-5p	MIMAT0000421	PARP11	57097	Microarray	17612493	Unspecified
hsa-mir-122-5p	MIMAT0000421	LYRM4	57128	HITS-CLIP	23313552	Unspecified
hsa-mir-122-5p	MIMAT0000421	APMAP	57136	Proteomics	21750653	Unspecified
hsa-mir-122-5p	MIMAT0000421	JPH2	57158	HITS-CLIP	23824327	Unspecified
hsa-mir-122-5p	MIMAT0000421	CLK4	57396	HITS-CLIP	23824327	Unspecified
hsa-mir-122-5p	MIMAT0000421	CYP20A1	57404	HITS-CLIP	23824327	Unspecified
hsa-mir-122-5p	MIMAT0000421	KIAA1143	57456	HITS-CLIP	23313552	Unspecified
hsa-mir-122-5p	MIMAT0000421	ESYT2	57488	HITS-CLIP	23824327	Unspecified
hsa-mir-122-5p	MIMAT0000421	XPO5	57510	HITS-CLIP	21572407	Unspecified
hsa-mir-122-5p	MIMAT0000421	HECW2	57520	Microarray	17612493	Unspecified
hsa-mir-122-5p	MIMAT0000421	PDP2	57546	HITS-CLIP	23824327	Unspecified
hsa-mir-122-5p	MIMAT0000421	EP400	57634	Microarray	17612493	Unspecified
hsa-mir-122-5p	MIMAT0000421	USP28	57646	Microarray	17612493	Unspecified
hsa-mir-122-5p	MIMAT0000421	ZBTB4	57659	Microarray	17612493	Unspecified
hsa-mir-122-5p	MIMAT0000421	ZFP14	57677	HITS-CLIP	24906430|27418678	Unspecified
hsa-mir-122-5p	MIMAT0000421	CPNE5	57699	Microarray	17612493	Unspecified
hsa-mir-122-5p	MIMAT0000421	POLD4	57804	PAR-CLIP	27292025	Unspecified
hsa-mir-122-5p	MIMAT0000421	MRPL17	63875	HITS-CLIP	23824327	Unspecified
hsa-mir-122-5p	MIMAT0000421	FAM217B	63939	HITS-CLIP	23824327	Unspecified
hsa-mir-122-5p	MIMAT0000421	CLSPN	63967	Microarray	17612493	Unspecified
hsa-mir-122-5p	MIMAT0000421	NOD2	64127	Luciferase reporter assay//qRT-PCR//Western blot	23872065	Unspecified
hsa-mir-122-5p	MIMAT0000421	ZNF106	64397	PAR-CLIP	27292025	Unspecified
hsa-mir-122-5p	MIMAT0000421	TMEM168	64418	HITS-CLIP	23824327	Unspecified
hsa-mir-122-5p	MIMAT0000421	MRPS25	64432	HITS-CLIP	23313552	Unspecified
hsa-mir-122-5p	MIMAT0000421	NOM1	64434	HITS-CLIP	23824327	Unspecified
hsa-mir-122-5p	MIMAT0000421	SMURF2	64750	Microarray	17612493	Unspecified
hsa-mir-122-5p	MIMAT0000421	MEAF6	64769	HITS-CLIP	23824327	Unspecified
hsa-mir-122-5p	MIMAT0000421	EFCAB6	64800	Proteomics	21750653	Unspecified
hsa-mir-122-5p	MIMAT0000421	KRI1	65095	PAR-CLIP	27292025	Unspecified
hsa-mir-122-5p	MIMAT0000421	AACS	65985	Luciferase reporter assay//qRT-PCR	19296470	Unspecified
hsa-mir-122-5p	MIMAT0000421	FUNDC2	65991	Luciferase reporter assay//qRT-PCR	19296470	Unspecified
hsa-mir-122-5p	MIMAT0000421	CENPM	79019	HITS-CLIP	23824327	Unspecified
hsa-mir-122-5p	MIMAT0000421	ZNF655	79027	HITS-CLIP	23824327	Unspecified
hsa-mir-122-5p	MIMAT0000421	GLB1L	79411	HITS-CLIP	27418678	Unspecified
hsa-mir-122-5p	MIMAT0000421	ATP13A3	79572	Microarray	17612493	Unspecified
hsa-mir-122-5p	MIMAT0000421	NKAP	79576	HITS-CLIP	23824327	Unspecified
hsa-mir-122-5p	MIMAT0000421	SLC52A2	79581	Microarray	17612493	Unspecified
hsa-mir-122-5p	MIMAT0000421	PGBD5	79605	HITS-CLIP	23824327	Unspecified
hsa-mir-122-5p	MIMAT0000421	HECTD3	79654	Microarray	17612493	Unspecified
hsa-mir-122-5p	MIMAT0000421	ZYG11B	79699	HITS-CLIP//PAR-CLIP	23824327|27292025	Unspecified
hsa-mir-122-5p	MIMAT0000421	TBL1XR1	79718	Microarray	17612493	Unspecified
hsa-mir-122-5p	MIMAT0000421	MOB3B	79817	Microarray	17612493	Unspecified
hsa-mir-122-5p	MIMAT0000421	MFSD13A	79847	HITS-CLIP	23313552	Unspecified
hsa-mir-122-5p	MIMAT0000421	SNX22	79856	HITS-CLIP	24906430	Unspecified
hsa-mir-122-5p	MIMAT0000421	ACTR5	79913	HITS-CLIP	21572407	Unspecified
hsa-mir-122-5p	MIMAT0000421	ADM2	79924	HITS-CLIP	23824327	Unspecified
hsa-mir-122-5p	MIMAT0000421	TNIP3	79931	HITS-CLIP	27418678	Unspecified
hsa-mir-122-5p	MIMAT0000421	SYNPO2L	79933	HITS-CLIP	23824327	Unspecified
hsa-mir-122-5p	MIMAT0000421	SLC35E1	79939	HITS-CLIP	23313552	Unspecified
hsa-mir-122-5p	MIMAT0000421	PLEKHS1	79949	HITS-CLIP//PAR-CLIP	23824327|23313552|27292025	Unspecified
hsa-mir-122-5p	MIMAT0000421	NOL10	79954	PAR-CLIP	27292025	Unspecified
hsa-mir-122-5p	MIMAT0000421	CCDC170	80129	PAR-CLIP	27292025	Unspecified
hsa-mir-122-5p	MIMAT0000421	NAA50	80218	HITS-CLIP	23824327	Unspecified
hsa-mir-122-5p	MIMAT0000421	RAB11FIP1	80223	HITS-CLIP//Luciferase reporter assay//qRT-PCR	19296470|23824327	Unspecified
hsa-mir-122-5p	MIMAT0000421	ORAI2	80228	HITS-CLIP//PAR-CLIP	23824327|27292025	Unspecified
hsa-mir-122-5p	MIMAT0000421	CXorf21	80231	HITS-CLIP	23824327	Unspecified
hsa-mir-122-5p	MIMAT0000421	HM13	81502	PAR-CLIP	20371350	Unspecified
hsa-mir-122-5p	MIMAT0000421	ANKRD13C	81573	Microarray	17612493	Unspecified
hsa-mir-122-5p	MIMAT0000421	NIPA2	81614	PAR-CLIP	26701625	Unspecified
hsa-mir-122-5p	MIMAT0000421	TIGD6	81789	HITS-CLIP	23824327	Unspecified
hsa-mir-122-5p	MIMAT0000421	RNF170	81790	HITS-CLIP//Microarray	17612493|23824327	Unspecified
hsa-mir-122-5p	MIMAT0000421	THAP2	83591	HITS-CLIP	23824327	Unspecified
hsa-mir-122-5p	MIMAT0000421	KATNAL1	84056	Microarray	17612493	Unspecified
hsa-mir-122-5p	MIMAT0000421	MAGT1	84061	HITS-CLIP	27418678	Unspecified
hsa-mir-122-5p	MIMAT0000421	MRI1	84245	HITS-CLIP	23824327	Unspecified
hsa-mir-122-5p	MIMAT0000421	YIPF4	84272	HITS-CLIP//PAR-CLIP	22012620|23824327	Unspecified
hsa-mir-122-5p	MIMAT0000421	SLC25A33	84275	HITS-CLIP	23824327	Unspecified
hsa-mir-122-5p	MIMAT0000421	MCM8	84515	PAR-CLIP	27292025	Unspecified
hsa-mir-122-5p	MIMAT0000421	DCTN5	84516	Microarray	17612493	Unspecified
hsa-mir-122-5p	MIMAT0000421	MT4	84560	Microarray	17612493	Unspecified
hsa-mir-122-5p	MIMAT0000421	MFSD14B	84641	PAR-CLIP	23592263|21572407|26701625	Unspecified
hsa-mir-122-5p	MIMAT0000421	ZNF347	84671	PAR-CLIP	27292025	Unspecified
hsa-mir-122-5p	MIMAT0000421	PPP1R9B	84687	Microarray	17612493	Unspecified
hsa-mir-122-5p	MIMAT0000421	PIGO	84720	HITS-CLIP//PAR-CLIP	23592263|24398324|23446348|21572407|20371350|23824327|27292025	Unspecified
hsa-mir-122-5p	MIMAT0000421	CNDP1	84735	HITS-CLIP	23824327	Unspecified
hsa-mir-122-5p	MIMAT0000421	LMNB2	84823	Microarray//PAR-CLIP	17612493|21572407|20371350	Unspecified
hsa-mir-122-5p	MIMAT0000421	LRCH3	84859	HITS-CLIP	23824327	Unspecified
hsa-mir-122-5p	MIMAT0000421	CCDC142	84865	HITS-CLIP	23824327	Unspecified
hsa-mir-122-5p	MIMAT0000421	ADO	84890	Microarray	17612493	Unspecified
hsa-mir-122-5p	MIMAT0000421	POMGNT2	84892	Microarray	17612493	Unspecified
hsa-mir-122-5p	MIMAT0000421	PLXDC2	84898	HITS-CLIP//PAR-CLIP	23824327|27292025	Unspecified
hsa-mir-122-5p	MIMAT0000421	NFATC2IP	84901	Luciferase reporter assay//qRT-PCR	19296470	Unspecified
hsa-mir-122-5p	MIMAT0000421	CEP89	84902	HITS-CLIP	23824327	Unspecified
hsa-mir-122-5p	MIMAT0000421	UTP4	84916	HITS-CLIP//PAR-CLIP	24398324|23446348|22012620|21572407|20371350	Unspecified
hsa-mir-122-5p	MIMAT0000421	LRP11	84918	Microarray	17612493	Unspecified
hsa-mir-122-5p	MIMAT0000421	MASTL	84930	HITS-CLIP	23824327	Unspecified
hsa-mir-122-5p	MIMAT0000421	SERAC1	84947	Microarray	17612493	Unspecified
hsa-mir-122-5p	MIMAT0000421	PRPF38A	84950	PAR-CLIP	27292025	Unspecified
hsa-mir-122-5p	MIMAT0000421	RRP36	88745	HITS-CLIP	21572407	Unspecified
hsa-mir-122-5p	MIMAT0000421	SIGLEC12	89858	PAR-CLIP	22012620	Unspecified
hsa-mir-122-5p	MIMAT0000421	C16orf45	89927	HITS-CLIP	23824327	Unspecified
hsa-mir-122-5p	MIMAT0000421	TMEM250	90120	HITS-CLIP	23824327	Unspecified
hsa-mir-122-5p	MIMAT0000421	ZSWIM1	90204	HITS-CLIP//PAR-CLIP	23592263|27418678	Unspecified
hsa-mir-122-5p	MIMAT0000421	ZNF160	90338	Microarray	17612493	Unspecified
hsa-mir-122-5p	MIMAT0000421	TIMM29	90580	HITS-CLIP//PAR-CLIP	22012620|21572407	Unspecified
hsa-mir-122-5p	MIMAT0000421	STARD13	90627	Microarray	17612493	Unspecified
hsa-mir-122-5p	MIMAT0000421	MFSD4B	91749	HITS-CLIP//PAR-CLIP	23824327|27292025	Unspecified
hsa-mir-122-5p	MIMAT0000421	LIN52	91750	HITS-CLIP	23824327	Unspecified
hsa-mir-122-5p	MIMAT0000421	SPECC1	92521	HITS-CLIP	19536157	Unspecified
hsa-mir-122-5p	MIMAT0000421	G6PC3	92579	Luciferase reporter assay//Microarray//qRT-PCR	19296470|17612493	Unspecified
hsa-mir-122-5p	MIMAT0000421	TIMM50	92609	PAR-CLIP	27292025	Unspecified
hsa-mir-122-5p	MIMAT0000421	SYAP1	94056	HITS-CLIP	24906430	Unspecified
hsa-mir-122-5p	MIMAT0000421	EGLN3	112399	Luciferase reporter assay//qRT-PCR	19296470	Unspecified
hsa-mir-122-5p	MIMAT0000421	GTF3C6	112495	Microarray	17612493	Unspecified
hsa-mir-122-5p	MIMAT0000421	XKR4	114786	HITS-CLIP	23824327	Unspecified
hsa-mir-122-5p	MIMAT0000421	RNF157	114804	HITS-CLIP	23824327	Unspecified
hsa-mir-122-5p	MIMAT0000421	SMYD4	114826	PAR-CLIP	27292025	Unspecified
hsa-mir-122-5p	MIMAT0000421	OSBPL10	114884	HITS-CLIP//PAR-CLIP	23592263|24398324|23446348|21572407|20371350|23824327|23706177|26701625|27292025	Unspecified
hsa-mir-122-5p	MIMAT0000421	FLYWCH2	114984	HITS-CLIP	23824327	Unspecified
hsa-mir-122-5p	MIMAT0000421	WDR31	114987	HITS-CLIP	23824327	Unspecified
hsa-mir-122-5p	MIMAT0000421	ZNF618	114991	Microarray	17612493	Unspecified
hsa-mir-122-5p	MIMAT0000421	BATF2	116071	Microarray	17612493	Unspecified
hsa-mir-122-5p	MIMAT0000421	FAM210B	116151	PAR-CLIP	27292025	Unspecified
hsa-mir-122-5p	MIMAT0000421	MOGAT1	116255	HITS-CLIP	23824327|23313552	Unspecified
hsa-mir-122-5p	MIMAT0000421	WDR17	116966	HITS-CLIP//PAR-CLIP	23824327|27292025	Unspecified
hsa-mir-122-5p	MIMAT0000421	SLC16A10	117247	HITS-CLIP	23824327|27418678	Unspecified
hsa-mir-122-5p	MIMAT0000421	ZNF354B	117608	HITS-CLIP//PAR-CLIP	23446348|22012620|21572407|20371350|23706177	Unspecified
hsa-mir-122-5p	MIMAT0000421	BORCS7	119032	PAR-CLIP	27292025	Unspecified
hsa-mir-122-5p	MIMAT0000421	ANKRD9	122416	HITS-CLIP	23824327	Unspecified
hsa-mir-122-5p	MIMAT0000421	MRPL52	122704	PAR-CLIP	23592263	Unspecified
hsa-mir-122-5p	MIMAT0000421	GPHB5	122876	Microarray	17612493	Unspecified
hsa-mir-122-5p	MIMAT0000421	CYB5D1	124637	HITS-CLIP	23824327	Unspecified
hsa-mir-122-5p	MIMAT0000421	KRBA2	124751	HITS-CLIP	23824327	Unspecified
hsa-mir-122-5p	MIMAT0000421	CCDC43	124808	PAR-CLIP	23592263	Unspecified
hsa-mir-122-5p	MIMAT0000421	ZNF573	126231	HITS-CLIP	23824327	Unspecified
hsa-mir-122-5p	MIMAT0000421	FBXO27	126433	PAR-CLIP	23446348|22012620	Unspecified
hsa-mir-122-5p	MIMAT0000421	RNF19B	127544	HITS-CLIP	23824327	Unspecified
hsa-mir-122-5p	MIMAT0000421	C1orf122	127687	Microarray	17612493	Unspecified
hsa-mir-122-5p	MIMAT0000421	TSHZ2	128553	HITS-CLIP	23824327	Unspecified
hsa-mir-122-5p	MIMAT0000421	ACVR1C	130399	Luciferase reporter assay//Reporter assay	21224400	Unspecified
hsa-mir-122-5p	MIMAT0000421	CPNE4	131034	Microarray	17612493	Unspecified
hsa-mir-122-5p	MIMAT0000421	GNPDA2	132789	Microarray	17612493	Unspecified
hsa-mir-122-5p	MIMAT0000421	ZNF786	136051	HITS-CLIP	23824327	Unspecified
hsa-mir-122-5p	MIMAT0000421	MTPN	136319	Microarray	17612493	Unspecified
hsa-mir-122-5p	MIMAT0000421	MPLKIP	136647	HITS-CLIP	23824327	Unspecified
hsa-mir-122-5p	MIMAT0000421	PTPDC1	138639	HITS-CLIP	23313552	Unspecified
hsa-mir-122-5p	MIMAT0000421	DOCK11	139818	PAR-CLIP	27292025	Unspecified
hsa-mir-122-5p	MIMAT0000421	BRI3BP	140707	Microarray	17612493	Unspecified
hsa-mir-122-5p	MIMAT0000421	SMCR8	140775	PAR-CLIP	26701625|27292025	Unspecified
hsa-mir-122-5p	MIMAT0000421	ROMO1	140823	HITS-CLIP	23824327	Unspecified
hsa-mir-122-5p	MIMAT0000421	KDELC2	143888	HITS-CLIP	23824327	Unspecified
hsa-mir-122-5p	MIMAT0000421	PTGR2	145482	HITS-CLIP	23824327	Unspecified
hsa-mir-122-5p	MIMAT0000421	RUNDC1	146923	HITS-CLIP	23313552	Unspecified
hsa-mir-122-5p	MIMAT0000421	BROX	148362	HITS-CLIP	23824327|19536157	Unspecified
hsa-mir-122-5p	MIMAT0000421	TMEM56	148534	HITS-CLIP	23824327	Unspecified
hsa-mir-122-5p	MIMAT0000421	DUSP18	150290	HITS-CLIP	23824327	Unspecified
hsa-mir-122-5p	MIMAT0000421	FAM117B	150864	Luciferase reporter assay//qRT-PCR	19296470	Unspecified
hsa-mir-122-5p	MIMAT0000421	TCF23	150921	HITS-CLIP	23824327	Unspecified
hsa-mir-122-5p	MIMAT0000421	GPR155	151556	HITS-CLIP	21572407	Unspecified
hsa-mir-122-5p	MIMAT0000421	SGO1	151648	HITS-CLIP	23824327	Unspecified
hsa-mir-122-5p	MIMAT0000421	THAP6	152815	HITS-CLIP	21572407	Unspecified
hsa-mir-122-5p	MIMAT0000421	SLC38A9	153129	HITS-CLIP	23824327	Unspecified
hsa-mir-122-5p	MIMAT0000421	METTL27	155368	HITS-CLIP	23824327|19536157	Unspecified
hsa-mir-122-5p	MIMAT0000421	TMEM74	157753	Microarray	17612493	Unspecified
hsa-mir-122-5p	MIMAT0000421	FAM120AOS	158293	HITS-CLIP	23824327	Unspecified
hsa-mir-122-5p	MIMAT0000421	PGBD4	161779	HITS-CLIP	23824327	Unspecified
hsa-mir-122-5p	MIMAT0000421	ZNF320	162967	PAR-CLIP	27292025	Unspecified
hsa-mir-122-5p	MIMAT0000421	DENND2C	163259	Microarray	17612493	Unspecified
hsa-mir-122-5p	MIMAT0000421	LCA5	167691	Microarray	17612493	Unspecified
hsa-mir-122-5p	MIMAT0000421	FUT11	170384	HITS-CLIP//PAR-CLIP	27292025|27418678	Unspecified
hsa-mir-122-5p	MIMAT0000421	ZNF431	170959	HITS-CLIP	23824327	Unspecified
hsa-mir-122-5p	MIMAT0000421	FAM9B	171483	HITS-CLIP	27418678	Unspecified
hsa-mir-122-5p	MIMAT0000421	AGO3	192669	PAR-CLIP	27292025	Unspecified
hsa-mir-122-5p	MIMAT0000421	DZIP1L	199221	Microarray	19296470	Unspecified
hsa-mir-122-5p	MIMAT0000421	ALG14	199857	HITS-CLIP	23824327	Unspecified
hsa-mir-122-5p	MIMAT0000421	IBA57	200205	HITS-CLIP	23824327	Unspecified
hsa-mir-122-5p	MIMAT0000421	APOBEC3A	200315	PAR-CLIP	27292025	Unspecified
hsa-mir-122-5p	MIMAT0000421	TRIM65	201292	Microarray	17612493	Unspecified
hsa-mir-122-5p	MIMAT0000421	ZSCAN4	201516	Microarray	17612493	Unspecified
hsa-mir-122-5p	MIMAT0000421	DNAJC18	202052	Microarray	17612493	Unspecified
hsa-mir-122-5p	MIMAT0000421	VMA21	203547	PAR-CLIP	21572407|20371350	Unspecified
hsa-mir-122-5p	MIMAT0000421	CDY2B	203611	Microarray	17612493	Unspecified
hsa-mir-122-5p	MIMAT0000421	TMEM136	219902	Microarray	17612493	Unspecified
hsa-mir-122-5p	MIMAT0000421	ZNF485	220992	HITS-CLIP//PAR-CLIP	24398324|23446348|22012620|21572407|20371350	Unspecified
hsa-mir-122-5p	MIMAT0000421	KIF6	221458	HITS-CLIP	19536157	Unspecified
hsa-mir-122-5p	MIMAT0000421	AKR7L	246181	HITS-CLIP//PAR-CLIP	23824327|27292025	Unspecified
hsa-mir-122-5p	MIMAT0000421	SLC25A30	253512	Microarray	17612493	Unspecified
hsa-mir-122-5p	MIMAT0000421	GK5	256356	HITS-CLIP	23824327	Unspecified
hsa-mir-122-5p	MIMAT0000421	NALCN	259232	Microarray	17612493	Unspecified
hsa-mir-122-5p	MIMAT0000421	FADS6	283985	HITS-CLIP	23824327	Unspecified
hsa-mir-122-5p	MIMAT0000421	NKPD1	284353	HITS-CLIP	23824327	Unspecified
hsa-mir-122-5p	MIMAT0000421	ZNF841	284371	HITS-CLIP	23824327	Unspecified
hsa-mir-122-5p	MIMAT0000421	FAM19A3	284467	Microarray	17612493	Unspecified
hsa-mir-122-5p	MIMAT0000421	SEC14L4	284904	PAR-CLIP	27292025	Unspecified
hsa-mir-122-5p	MIMAT0000421	RABL3	285282	HITS-CLIP	23824327	Unspecified
hsa-mir-122-5p	MIMAT0000421	XKR6	286046	HITS-CLIP	23824327	Unspecified
hsa-mir-122-5p	MIMAT0000421	DPY19L4	286148	HITS-CLIP	23824327	Unspecified
hsa-mir-122-5p	MIMAT0000421	C14orf39	317761	Microarray	17612493	Unspecified
hsa-mir-122-5p	MIMAT0000421	RAB43	339122	PAR-CLIP	26701625	Unspecified
hsa-mir-122-5p	MIMAT0000421	ACER2	340485	PAR-CLIP	24398324	Unspecified
hsa-mir-122-5p	MIMAT0000421	VSIG1	340547	HITS-CLIP	23824327	Unspecified
hsa-mir-122-5p	MIMAT0000421	FMN1	342184	HITS-CLIP	23824327	Unspecified
hsa-mir-122-5p	MIMAT0000421	SMTNL2	342527	HITS-CLIP	23824327	Unspecified
hsa-mir-122-5p	MIMAT0000421	MOGAT3	346606	PAR-CLIP	27292025	Unspecified
hsa-mir-122-5p	MIMAT0000421	FAM71F2	346653	HITS-CLIP	23824327	Unspecified
hsa-mir-122-5p	MIMAT0000421	ZNF233	353355	Microarray	17612493	Unspecified
hsa-mir-122-5p	MIMAT0000421	DNAJB13	374407	HITS-CLIP	21572407	Unspecified
hsa-mir-122-5p	MIMAT0000421	ANKRD36	375248	HITS-CLIP	21572407	Unspecified
hsa-mir-122-5p	MIMAT0000421	RBM43	375287	PAR-CLIP	21572407	Unspecified
hsa-mir-122-5p	MIMAT0000421	C3orf62	375341	HITS-CLIP	23313552	Unspecified
hsa-mir-122-5p	MIMAT0000421	VWC2	375567	PAR-CLIP	27292025	Unspecified
hsa-mir-122-5p	MIMAT0000421	ZNF322P1	387328	PAR-CLIP	20371350	Unspecified
hsa-mir-122-5p	MIMAT0000421	RGS9BP	388531	HITS-CLIP	23824327	Unspecified
hsa-mir-122-5p	MIMAT0000421	FLG2	388698	HITS-CLIP	23706177	Unspecified
hsa-mir-122-5p	MIMAT0000421	PLEKHM3	389072	HITS-CLIP	23824327	Unspecified
hsa-mir-122-5p	MIMAT0000421	IYD	389434	HITS-CLIP	23824327	Unspecified
hsa-mir-122-5p	MIMAT0000421	FAM102A	399665	Microarray	17612493	Unspecified
hsa-mir-122-5p	MIMAT0000421	ZNF321P	399669	Microarray	17612493	Unspecified
hsa-mir-122-5p	MIMAT0000421	HACD4	401494	HITS-CLIP	23824327	Unspecified
hsa-mir-122-5p	MIMAT0000421	BCL2L15	440603	HITS-CLIP	23313552	Unspecified
hsa-mir-122-5p	MIMAT0000421	CISD2	493856	PAR-CLIP	27292025	Unspecified
hsa-mir-122-5p	MIMAT0000421	AGAP9	642517	HITS-CLIP	23824327	Unspecified
hsa-mir-122-5p	MIMAT0000421	ARIH2OS	646450	HITS-CLIP	23824327	Unspecified
hsa-mir-122-5p	MIMAT0000421	ZBTB8A	653121	HITS-CLIP	23824327|27418678	Unspecified
hsa-mir-122-5p	MIMAT0000421	POM121L7P	728418	HITS-CLIP	24906430	Unspecified
hsa-mir-122-5p	MIMAT0000421	SLC35E2B	728661	HITS-CLIP	23824327	Unspecified
hsa-mir-122-5p	MIMAT0000421	PRR23A	729627	HITS-CLIP//PAR-CLIP	23824327|27292025	Unspecified
hsa-mir-122-5p	MIMAT0000421	ISPD	729920	HITS-CLIP	27418678	Unspecified
hsa-mir-122-5p	MIMAT0000421	LRRC3C	100505591	HITS-CLIP	23824327	Unspecified
hsa-mir-122-5p	MIMAT0000421	ARL17B	100506084	HITS-CLIP	23824327	Unspecified
hsa-mir-122-5p	MIMAT0000421	ISY1-RAB43	100534599	PAR-CLIP	26701625	Unspecified
hsa-mir-125a-5p	MIMAT0000443	ABL2	27	Luciferase reporter assay//qRT-PCR//Western blot	26766902	Unspecified
hsa-mir-125a-5p	MIMAT0000443	AKT1	207	qRT-PCR//Western blot	26622553	Unspecified
hsa-mir-125a-5p	MIMAT0000443	ATP5G2	517	CLASH	23622248	Unspecified
hsa-mir-125a-5p	MIMAT0000443	BAK1	578	Flow//Luciferase reporter assay//qRT-PCR//Western blot	20616003	Unspecified
hsa-mir-125a-5p	MIMAT0000443	BCL2	596	Luciferase reporter assay//qRT-PCR//Western blot	26297542	Unspecified
hsa-mir-125a-5p	MIMAT0000443	PRDM1	639	Microarray//qRT-PCR	22815788	Unspecified
hsa-mir-125a-5p	MIMAT0000443	VPS51	738	Luciferase reporter assay	25172656	Unspecified
hsa-mir-125a-5p	MIMAT0000443	CASP2	835	Flow//Luciferase reporter assay//qRT-PCR//Western blot	26962687	Unspecified
hsa-mir-125a-5p	MIMAT0000443	CD34	947	Luciferase reporter assay//Microarray//Reporter assay//Western blot	18308931	Unspecified
hsa-mir-125a-5p	MIMAT0000443	SCARB2	950	PAR-CLIP	24398324|21572407	Unspecified
hsa-mir-125a-5p	MIMAT0000443	CDKN1A	1026	Luciferase reporter assay//qRT-PCR//Western blot	20190813	Unspecified
hsa-mir-125a-5p	MIMAT0000443	CLCN7	1186	CLASH	23622248	Unspecified
hsa-mir-125a-5p	MIMAT0000443	COL4A1	1282	CLASH	23622248	Unspecified
hsa-mir-125a-5p	MIMAT0000443	CRK	1398	Sequencing	20371350	Unspecified
hsa-mir-125a-5p	MIMAT0000443	MAPK14	1432	Luciferase reporter assay	28386337	Unspecified
hsa-mir-125a-5p	MIMAT0000443	CSNK2A1	1457	PAR-CLIP	22012620	Unspecified
hsa-mir-125a-5p	MIMAT0000443	DLST	1743	CLASH	23622248	Unspecified
hsa-mir-125a-5p	MIMAT0000443	DOCK3	1795	Microarray//qRT-PCR	22815788	Unspecified
hsa-mir-125a-5p	MIMAT0000443	ARID3A	1820	Luciferase reporter assay//qRT-PCR//Western blot	28408353	Unspecified
hsa-mir-125a-5p	MIMAT0000443	DUSP3	1845	Sequencing	20371350	Unspecified
hsa-mir-125a-5p	MIMAT0000443	E2F3	1871	Flow//Luciferase reporter assay//qRT-PCR//Western blot	25733534	Unspecified
hsa-mir-125a-5p	MIMAT0000443	EDN1	1906	Luciferase reporter assay	27106952	Unspecified
hsa-mir-125a-5p	MIMAT0000443	EEF1A1	1915	CLASH	23622248	Unspecified
hsa-mir-125a-5p	MIMAT0000443	MEGF9	1955	Microarray//qRT-PCR	22815788	Unspecified
hsa-mir-125a-5p	MIMAT0000443	EGFR	1956	qRT-PCR//Western blot	24484870	Unspecified
hsa-mir-125a-5p	MIMAT0000443	EIF4E	1977	HITS-CLIP	23824327	Unspecified
hsa-mir-125a-5p	MIMAT0000443	EIF4EBP1	1978	Luciferase reporter assay//qRT-PCR//Sequencing//Western blot	20371350|26646586	Unspecified
hsa-mir-125a-5p	MIMAT0000443	ELAVL1	1994	Luciferase reporter assay//Western blot	19875930	Unspecified
hsa-mir-125a-5p	MIMAT0000443	ENO1	2023	CLASH	23622248	Unspecified
hsa-mir-125a-5p	MIMAT0000443	ERBB2	2064	Luciferase reporter assay//Northern blot//qRT-PCR//Western blot	17110380|21220473|23519125|25833836	Unspecified
hsa-mir-125a-5p	MIMAT0000443	ERBB3	2065	Luciferase reporter assay//Microarray//Northern blot//qRT-PCR//Western blot	17110380|20864407|23519125	Unspecified
hsa-mir-125a-5p	MIMAT0000443	ESRRA	2101	Luciferase reporter assay//Western blot	25266720	Unspecified
hsa-mir-125a-5p	MIMAT0000443	MTOR	2475	qRT-PCR//Western blot	26622553	Unspecified
hsa-mir-125a-5p	MIMAT0000443	B4GALT1	2683	Microarray//qRT-PCR	22815788	Unspecified
hsa-mir-125a-5p	MIMAT0000443	GOLGA1	2800	HITS-CLIP	23313552	Unspecified
hsa-mir-125a-5p	MIMAT0000443	MKNK2	2872	PAR-CLIP	26701625	Unspecified
hsa-mir-125a-5p	MIMAT0000443	GSS	2937	PAR-CLIP	22012620	Unspecified
hsa-mir-125a-5p	MIMAT0000443	HK2	3099	Luciferase reporter assay	22593586	Unspecified
hsa-mir-125a-5p	MIMAT0000443	HOXC4	3221	Sequencing	20371350	Unspecified
hsa-mir-125a-5p	MIMAT0000443	HOXD1	3231	PAR-CLIP	22012620	Unspecified
hsa-mir-125a-5p	MIMAT0000443	IFNG	3458	ELISA//Microarray//qRT-PCR//silico analysis//Western blot	24759737	Unspecified
hsa-mir-125a-5p	MIMAT0000443	IL1RN	3557	Microarray//qRT-PCR	22815788	Unspecified
hsa-mir-125a-5p	MIMAT0000443	IRF4	3662	PAR-CLIP	23446348|21572407|20371350	Unspecified
hsa-mir-125a-5p	MIMAT0000443	JAK2	3717	qRT-PCR//Western blot	26011312	Unspecified
hsa-mir-125a-5p	MIMAT0000443	KRTAP5-9	3846	HITS-CLIP	23824327	Unspecified
hsa-mir-125a-5p	MIMAT0000443	LAMB1	3912	CLASH	23622248	Unspecified
hsa-mir-125a-5p	MIMAT0000443	LFNG	3955	Luciferase reporter assay	23484856	Unspecified
hsa-mir-125a-5p	MIMAT0000443	LIF	3976	ELISA	19011087	Unspecified
hsa-mir-125a-5p	MIMAT0000443	LIFR	3977	Luciferase reporter assay//Western blot	21788734|25962054	Unspecified
hsa-mir-125a-5p	MIMAT0000443	SMAD2	4087	Luciferase reporter assay	27388239	Unspecified
hsa-mir-125a-5p	MIMAT0000443	SMAD4	4089	Luciferase reporter assay//Western blot	22357933	Unspecified
hsa-mir-125a-5p	MIMAT0000443	MAT2A	4144	CLASH	23622248	Unspecified
hsa-mir-125a-5p	MIMAT0000443	MCL1	4170	Luciferase reporter assay//qRT-PCR//Western blot	26297542	Unspecified
hsa-mir-125a-5p	MIMAT0000443	MAP3K1	4214	CLASH	23622248	Unspecified
hsa-mir-125a-5p	MIMAT0000443	MMP11	4320	Immunohistochemistry//Luciferase reporter assay//qRT-PCR//Western blot	22768249	Unspecified
hsa-mir-125a-5p	MIMAT0000443	ND6	4541	CLASH	23622248	Unspecified
hsa-mir-125a-5p	MIMAT0000443	MYC	4609	TRAP	24510096	Unspecified
hsa-mir-125a-5p	MIMAT0000443	NDUFB6	4712	Sequencing	20371350	Unspecified
hsa-mir-125a-5p	MIMAT0000443	NF2	4771	PAR-CLIP	26701625	Unspecified
hsa-mir-125a-5p	MIMAT0000443	NME2	4831	CLASH	23622248	Unspecified
hsa-mir-125a-5p	MIMAT0000443	NPM1	4869	CLASH	23622248	Unspecified
hsa-mir-125a-5p	MIMAT0000443	NTRK3	4916	Luciferase reporter assay//Western blot	17483472|19179615|18973228	Unspecified
hsa-mir-125a-5p	MIMAT0000443	OPRL1	4987	PAR-CLIP	22012620	Unspecified
hsa-mir-125a-5p	MIMAT0000443	PAM	5066	CLASH	23622248	Unspecified
hsa-mir-125a-5p	MIMAT0000443	PC	5091	CLASH	23622248	Unspecified
hsa-mir-125a-5p	MIMAT0000443	PDPK1	5170	Sequencing	20371350	Unspecified
hsa-mir-125a-5p	MIMAT0000443	PFKM	5213	HITS-CLIP	23824327	Unspecified
hsa-mir-125a-5p	MIMAT0000443	PGM3	5238	CLASH	23622248	Unspecified
hsa-mir-125a-5p	MIMAT0000443	PIK3CG	5294	qRT-PCR//Western blot	26622553	Unspecified
hsa-mir-125a-5p	MIMAT0000443	PLS3	5358	CLASH	23622248	Unspecified
hsa-mir-125a-5p	MIMAT0000443	PPP2CA	5515	PAR-CLIP	20371350	Unspecified
hsa-mir-125a-5p	MIMAT0000443	PPP2R5E	5529	CLASH	23622248	Unspecified
hsa-mir-125a-5p	MIMAT0000443	MAPK8	5599	Sequencing	20371350	Unspecified
hsa-mir-125a-5p	MIMAT0000443	MAP2K7	5609	CLASH	23622248	Unspecified
hsa-mir-125a-5p	MIMAT0000443	MASP1	5648	qRT-PCR	24675842	Unspecified
hsa-mir-125a-5p	MIMAT0000443	PTBP1	5725	HITS-CLIP	23313552	Unspecified
hsa-mir-125a-5p	MIMAT0000443	PTGS1	5742	HITS-CLIP	19536157	Unspecified
hsa-mir-125a-5p	MIMAT0000443	RAB4A	5867	PAR-CLIP	23446348	Unspecified
hsa-mir-125a-5p	MIMAT0000443	RAF1	5894	Luciferase reporter assay//qRT-PCR//Western blot	27982429	Unspecified
hsa-mir-125a-5p	MIMAT0000443	RARA	5914	Microarray//Northern blot	16331254	Unspecified
hsa-mir-125a-5p	MIMAT0000443	REST	5978	PAR-CLIP	23592263|24398324|21572407|26701625	Unspecified
hsa-mir-125a-5p	MIMAT0000443	RIT1	6016	Microarray//qRT-PCR	22815788	Unspecified
hsa-mir-125a-5p	MIMAT0000443	RPL9	6133	CLASH	23622248	Unspecified
hsa-mir-125a-5p	MIMAT0000443	RPL35A	6165	CLASH	23622248	Unspecified
hsa-mir-125a-5p	MIMAT0000443	RPS2	6187	CLASH	23622248	Unspecified
hsa-mir-125a-5p	MIMAT0000443	RTN2	6253	qRT-PCR	24675842	Unspecified
hsa-mir-125a-5p	MIMAT0000443	ATXN1	6310	Sequencing	20371350	Unspecified
hsa-mir-125a-5p	MIMAT0000443	CCL5	6352	ELISA	20589685	Unspecified
hsa-mir-125a-5p	MIMAT0000443	SELENOW	6415	CLASH	23622248	Unspecified
hsa-mir-125a-5p	MIMAT0000443	SIX1	6495	HITS-CLIP	23824327|19536157|27418678	Unspecified
hsa-mir-125a-5p	MIMAT0000443	SLC1A5	6510	Sequencing	20371350	Unspecified
hsa-mir-125a-5p	MIMAT0000443	SP1	6667	CLASH	23622248	Unspecified
hsa-mir-125a-5p	MIMAT0000443	STAT2	6773	CLASH	23622248	Unspecified
hsa-mir-125a-5p	MIMAT0000443	STAT3	6774	Immunoblot//Immunohistochemistry//Luciferase reporter assay//qRT-PCR	26389681	Unspecified
hsa-mir-125a-5p	MIMAT0000443	TAZ	6901	Luciferase reporter assay	27094723	Unspecified
hsa-mir-125a-5p	MIMAT0000443	ELOB	6923	Sequencing	20371350	Unspecified
hsa-mir-125a-5p	MIMAT0000443	TDG	6996	CLASH	23622248	Unspecified
hsa-mir-125a-5p	MIMAT0000443	TEF	7008	qRT-PCR	24675842	Unspecified
hsa-mir-125a-5p	MIMAT0000443	TFRC	7037	CLASH	23622248	Unspecified
hsa-mir-125a-5p	MIMAT0000443	TNFAIP3	7128	Luciferase reporter assay//qRT-PCR//Western blot	22550173|26758190	Unspecified
hsa-mir-125a-5p	MIMAT0000443	TP53	7157	Luciferase reporter assay//Northern blot//qRT-PCR//Western blot	19818772|26017674	Unspecified
hsa-mir-125a-5p	MIMAT0000443	TPI1	7167	CLASH	23622248	Unspecified
hsa-mir-125a-5p	MIMAT0000443	TPM4	7171	CLASH	23622248	Unspecified
hsa-mir-125a-5p	MIMAT0000443	TRAF6	7189	Luciferase reporter assay//qRT-PCR//Western blot	24360988	Unspecified
hsa-mir-125a-5p	MIMAT0000443	TRPS1	7227	Microarray//qRT-PCR	22815788	Unspecified
hsa-mir-125a-5p	MIMAT0000443	UBE2G2	7327	CLASH	23622248	Unspecified
hsa-mir-125a-5p	MIMAT0000443	UBE2L3	7332	qRT-PCR	24675842	Unspecified
hsa-mir-125a-5p	MIMAT0000443	VEGFA	7422	ELISA//Luciferase reporter assay//qRT-PCR//Western blot	18320040|26398444	Unspecified
hsa-mir-125a-5p	MIMAT0000443	XPO1	7514	CLASH	23622248	Unspecified
hsa-mir-125a-5p	MIMAT0000443	YES1	7525	CLASH//Sequencing	20371350|23622248	Unspecified
hsa-mir-125a-5p	MIMAT0000443	ZNF177	7730	HITS-CLIP	19536157	Unspecified
hsa-mir-125a-5p	MIMAT0000443	BTG2	7832	PAR-CLIP	24398324|21572407|26701625	Unspecified
hsa-mir-125a-5p	MIMAT0000443	IFRD2	7866	PAR-CLIP	20371350	Unspecified
hsa-mir-125a-5p	MIMAT0000443	COIL	8161	CLASH	23622248	Unspecified
hsa-mir-125a-5p	MIMAT0000443	DYRK2	8445	PAR-CLIP	21572407	Unspecified
hsa-mir-125a-5p	MIMAT0000443	OGT	8473	CLASH	23622248	Unspecified
hsa-mir-125a-5p	MIMAT0000443	SNX4	8723	Sequencing	20371350	Unspecified
hsa-mir-125a-5p	MIMAT0000443	ADAM9	8754	qRT-PCR	24675842	Unspecified
hsa-mir-125a-5p	MIMAT0000443	TNFRSF10B	8795	HITS-CLIP	23313552	Unspecified
hsa-mir-125a-5p	MIMAT0000443	SGPL1	8879	PAR-CLIP	23592263	Unspecified
hsa-mir-125a-5p	MIMAT0000443	PRC1	9055	CLASH	23622248	Unspecified
hsa-mir-125a-5p	MIMAT0000443	CLDN12	9069	PAR-CLIP//Sequencing	20371350	Unspecified
hsa-mir-125a-5p	MIMAT0000443	TMEM59	9528	HITS-CLIP	23824327	Unspecified
hsa-mir-125a-5p	MIMAT0000443	ATP5J2	9551	CLASH	23622248	Unspecified
hsa-mir-125a-5p	MIMAT0000443	PREPL	9581	CLASH	23622248	Unspecified
hsa-mir-125a-5p	MIMAT0000443	CREB5	9586	Sequencing	20371350	Unspecified
hsa-mir-125a-5p	MIMAT0000443	HDAC4	9759	Immunohistochemistry//Luciferase reporter assay//Western blot	25504437	Unspecified
hsa-mir-125a-5p	MIMAT0000443	KIAA0232	9778	CLASH	23622248	Unspecified
hsa-mir-125a-5p	MIMAT0000443	IP6K1	9807	CLASH	23622248	Unspecified
hsa-mir-125a-5p	MIMAT0000443	ZEB2	9839	TRAP	24510096	Unspecified
hsa-mir-125a-5p	MIMAT0000443	THRAP3	9967	CLASH	23622248	Unspecified
hsa-mir-125a-5p	MIMAT0000443	NR1D2	9975	Sequencing	20371350	Unspecified
hsa-mir-125a-5p	MIMAT0000443	HDAC5	10014	Flow//Immunoblot//Luciferase reporter assay//qRT-PCR//Western blot	25531695	Unspecified
hsa-mir-125a-5p	MIMAT0000443	ARPC5	10092	Sequencing	20371350	Unspecified
hsa-mir-125a-5p	MIMAT0000443	ARIH2	10425	PAR-CLIP	20371350|27292025	Unspecified
hsa-mir-125a-5p	MIMAT0000443	LYPLA1	10434	CLASH	23622248	Unspecified
hsa-mir-125a-5p	MIMAT0000443	C1D	10438	HITS-CLIP	19536157	Unspecified
hsa-mir-125a-5p	MIMAT0000443	HAX1	10456	Luciferase reporter assay//qRT-PCR//Western blot	27880721	Unspecified
hsa-mir-125a-5p	MIMAT0000443	SEMA4B	10509	PAR-CLIP	26701625	Unspecified
hsa-mir-125a-5p	MIMAT0000443	TACC2	10579	PAR-CLIP	27292025	Unspecified
hsa-mir-125a-5p	MIMAT0000443	SMC2	10592	HITS-CLIP	23313552	Unspecified
hsa-mir-125a-5p	MIMAT0000443	ARID3B	10620	Immunofluorescence//qRT-PCR//Western blot	19881956	Unspecified
hsa-mir-125a-5p	MIMAT0000443	SPHAR	10638	PAR-CLIP	23446348	Unspecified
hsa-mir-125a-5p	MIMAT0000443	RALBP1	10928	CLASH	23622248	Unspecified
hsa-mir-125a-5p	MIMAT0000443	EHD1	10938	PAR-CLIP	23592263	Unspecified
hsa-mir-125a-5p	MIMAT0000443	COPZ1	22818	PAR-CLIP	26701625	Unspecified
hsa-mir-125a-5p	MIMAT0000443	MON1B	22879	HITS-CLIP	19536157	Unspecified
hsa-mir-125a-5p	MIMAT0000443	MORC2	22880	CLASH	23622248	Unspecified
hsa-mir-125a-5p	MIMAT0000443	GOLGA8A	23015	PAR-CLIP	23592263|24398324|23446348|21572407|20371350	Unspecified
hsa-mir-125a-5p	MIMAT0000443	RRP1B	23076	CLASH	23622248	Unspecified
hsa-mir-125a-5p	MIMAT0000443	PEG10	23089	CLASH	23622248	Unspecified
hsa-mir-125a-5p	MIMAT0000443	ZZEF1	23140	CLASH	23622248	Unspecified
hsa-mir-125a-5p	MIMAT0000443	DIP2A	23181	CLASH	23622248	Unspecified
hsa-mir-125a-5p	MIMAT0000443	TBC1D1	23216	CLASH	23622248	Unspecified
hsa-mir-125a-5p	MIMAT0000443	PUM2	23369	Sequencing	20371350	Unspecified
hsa-mir-125a-5p	MIMAT0000443	SRGAP2	23380	CLASH	23622248	Unspecified
hsa-mir-125a-5p	MIMAT0000443	MACF1	23499	CLASH	23622248	Unspecified
hsa-mir-125a-5p	MIMAT0000443	NNT	23530	CLASH	23622248	Unspecified
hsa-mir-125a-5p	MIMAT0000443	TNPO3	23534	HITS-CLIP	28735896	Unspecified
hsa-mir-125a-5p	MIMAT0000443	CLEC5A	23601	Luciferase reporter assay//qRT-PCR	24216483	Unspecified
hsa-mir-125a-5p	MIMAT0000443	CORO1C	23603	Sequencing	20371350	Unspecified
hsa-mir-125a-5p	MIMAT0000443	PANX1	24145	Sequencing	20371350	Unspecified
hsa-mir-125a-5p	MIMAT0000443	LSM4	25804	PAR-CLIP	20371350|27292025	Unspecified
hsa-mir-125a-5p	MIMAT0000443	BACE2	25825	HITS-CLIP	23824327|28735896	Unspecified
hsa-mir-125a-5p	MIMAT0000443	ZNF385A	25946	PAR-CLIP	24398324	Unspecified
hsa-mir-125a-5p	MIMAT0000443	FBXO10	26267	CLASH	23622248	Unspecified
hsa-mir-125a-5p	MIMAT0000443	TRMT2A	27037	CLASH	23622248	Unspecified
hsa-mir-125a-5p	MIMAT0000443	TOR2A	27433	HITS-CLIP//PAR-CLIP	23592263|23313552	Unspecified
hsa-mir-125a-5p	MIMAT0000443	OSTM1	28962	Sequencing	20371350	Unspecified
hsa-mir-125a-5p	MIMAT0000443	GRHL1	29841	Microarray//qRT-PCR	22815788	Unspecified
hsa-mir-125a-5p	MIMAT0000443	TNPO2	30000	Sequencing	20371350	Unspecified
hsa-mir-125a-5p	MIMAT0000443	ZDHHC9	51114	CLASH	23622248	Unspecified
hsa-mir-125a-5p	MIMAT0000443	NIN	51199	CLASH	23622248	Unspecified
hsa-mir-125a-5p	MIMAT0000443	ZBTB7A	51341	Flow//GFP reporter assay//Luciferase reporter assay//Microarray//qRT-PCR//Western blot	26713860	Unspecified
hsa-mir-125a-5p	MIMAT0000443	NOP16	51491	Sequencing	20371350	Unspecified
hsa-mir-125a-5p	MIMAT0000443	NCKIPSD	51517	CLASH	23622248	Unspecified
hsa-mir-125a-5p	MIMAT0000443	SIRT7	51547	Flow//Immunoblot//Luciferase reporter assay//Microarray//Northern blot//qRT-PCR//Western blot	23079745	Unspecified
hsa-mir-125a-5p	MIMAT0000443	KLF13	51621	ELISA//Luciferase reporter assay//qRT-PCR//Western blot	20589685|24151079	Unspecified
hsa-mir-125a-5p	MIMAT0000443	CD244	51744	HITS-CLIP	19536157	Unspecified
hsa-mir-125a-5p	MIMAT0000443	PANK1	53354	HITS-CLIP	23824327	Unspecified
hsa-mir-125a-5p	MIMAT0000443	HMGCLL1	54511	HITS-CLIP	19536157	Unspecified
hsa-mir-125a-5p	MIMAT0000443	MRPL50	54534	CLASH	23622248	Unspecified
hsa-mir-125a-5p	MIMAT0000443	DLL4	54567	Flow//Immunofluorescence//Luciferase reporter assay//Western blot	27252357	Unspecified
hsa-mir-125a-5p	MIMAT0000443	TOR4A	54863	CLASH	23622248	Unspecified
hsa-mir-125a-5p	MIMAT0000443	SEMA4C	54910	PAR-CLIP	24398324|23446348|20371350	Unspecified
hsa-mir-125a-5p	MIMAT0000443	C17orf80	55028	CLASH	23622248	Unspecified
hsa-mir-125a-5p	MIMAT0000443	UBR7	55148	PAR-CLIP	21572407	Unspecified
hsa-mir-125a-5p	MIMAT0000443	LINS1	55180	HITS-CLIP	24906430|23824327	Unspecified
hsa-mir-125a-5p	MIMAT0000443	ETNK2	55224	Microarray//qRT-PCR	22815788	Unspecified
hsa-mir-125a-5p	MIMAT0000443	MEG3	55384	ELISA//Luciferase reporter assay//qRT-PCR//Western blot	27522004	Unspecified
hsa-mir-125a-5p	MIMAT0000443	YOD1	55432	PAR-CLIP//Sequencing	20371350|23446348	Unspecified
hsa-mir-125a-5p	MIMAT0000443	FERMT1	55612	CLASH	23622248	Unspecified
hsa-mir-125a-5p	MIMAT0000443	G2E3	55632	CLASH	23622248	Unspecified
hsa-mir-125a-5p	MIMAT0000443	UNC45A	55898	CLASH	23622248	Unspecified
hsa-mir-125a-5p	MIMAT0000443	PCDHGB2	56103	CLASH	23622248	Unspecified
hsa-mir-125a-5p	MIMAT0000443	DHX33	56919	PAR-CLIP	21572407	Unspecified
hsa-mir-125a-5p	MIMAT0000443	ATXN7L3	56970	CLASH	23622248	Unspecified
hsa-mir-125a-5p	MIMAT0000443	STOX2	56977	PAR-CLIP	21572407|20371350	Unspecified
hsa-mir-125a-5p	MIMAT0000443	AGTRAP	57085	CLASH	23622248	Unspecified
hsa-mir-125a-5p	MIMAT0000443	PLXDC1	57125	PAR-CLIP	22291592	Unspecified
hsa-mir-125a-5p	MIMAT0000443	TMEM63C	57156	PAR-CLIP	27292025	Unspecified
hsa-mir-125a-5p	MIMAT0000443	PLEKHG5	57449	PAR-CLIP	22012620	Unspecified
hsa-mir-125a-5p	MIMAT0000443	MTUS1	57509	Microarray//Northern blot	16331254	Unspecified
hsa-mir-125a-5p	MIMAT0000443	ZSWIM6	57688	PAR-CLIP	23446348|20371350	Unspecified
hsa-mir-125a-5p	MIMAT0000443	RBAK	57786	Sequencing	20371350	Unspecified
hsa-mir-125a-5p	MIMAT0000443	PCTP	58488	PAR-CLIP	21572407	Unspecified
hsa-mir-125a-5p	MIMAT0000443	HRH4	59340	HITS-CLIP	23706177	Unspecified
hsa-mir-125a-5p	MIMAT0000443	ATL2	64225	Sequencing	20371350	Unspecified
hsa-mir-125a-5p	MIMAT0000443	IPPK	64768	HITS-CLIP	19536157	Unspecified
hsa-mir-125a-5p	MIMAT0000443	FAM129B	64855	Microarray//qRT-PCR	22815788	Unspecified
hsa-mir-125a-5p	MIMAT0000443	WNK3	65267	CLASH	23622248	Unspecified
hsa-mir-125a-5p	MIMAT0000443	ZBTB10	65986	Sequencing	20371350	Unspecified
hsa-mir-125a-5p	MIMAT0000443	OTUB2	78990	CLASH	23622248	Unspecified
hsa-mir-125a-5p	MIMAT0000443	GGCT	79017	CLASH	23622248	Unspecified
hsa-mir-125a-5p	MIMAT0000443	NUP37	79023	PAR-CLIP	21572407|20371350	Unspecified
hsa-mir-125a-5p	MIMAT0000443	PDCL3	79031	CLASH	23622248	Unspecified
hsa-mir-125a-5p	MIMAT0000443	RSG1	79363	HITS-CLIP	28735896	Unspecified
hsa-mir-125a-5p	MIMAT0000443	GALNT14	79623	Luciferase reporter assay//qRT-PCR//Western blot	27133078	Unspecified
hsa-mir-125a-5p	MIMAT0000443	LIN28A	79727	Luciferase reporter assay	16227573	Unspecified
hsa-mir-125a-5p	MIMAT0000443	ZFAND1	79752	Sequencing	20371350	Unspecified
hsa-mir-125a-5p	MIMAT0000443	ERMP1	79956	Sequencing	20371350	Unspecified
hsa-mir-125a-5p	MIMAT0000443	FBXL18	80028	PAR-CLIP	26701625	Unspecified
hsa-mir-125a-5p	MIMAT0000443	SH3BP5L	80851	PAR-CLIP	22100165	Unspecified
hsa-mir-125a-5p	MIMAT0000443	NDEL1	81565	CLASH	23622248	Unspecified
hsa-mir-125a-5p	MIMAT0000443	BCL2L12	83596	Luciferase reporter assay//qRT-PCR//Western blot	26297542	Unspecified
hsa-mir-125a-5p	MIMAT0000443	GUCD1	83606	Sequencing	20371350	Unspecified
hsa-mir-125a-5p	MIMAT0000443	SPRTN	83932	CLASH	23622248	Unspecified
hsa-mir-125a-5p	MIMAT0000443	YIPF4	84272	CLASH	23622248	Unspecified
hsa-mir-125a-5p	MIMAT0000443	EIF1AD	84285	HITS-CLIP	19536157	Unspecified
hsa-mir-125a-5p	MIMAT0000443	TMEM101	84336	PAR-CLIP//Sequencing	20371350|21572407	Unspecified
hsa-mir-125a-5p	MIMAT0000443	PARD6B	84612	Sequencing	20371350	Unspecified
hsa-mir-125a-5p	MIMAT0000443	MFSD9	84804	PAR-CLIP	21572407|20371350	Unspecified
hsa-mir-125a-5p	MIMAT0000443	MUM1	84939	PAR-CLIP	26701625|27292025	Unspecified
hsa-mir-125a-5p	MIMAT0000443	CGNL1	84952	CLASH	23622248	Unspecified
hsa-mir-125a-5p	MIMAT0000443	RBM17	84991	Sequencing	20371350	Unspecified
hsa-mir-125a-5p	MIMAT0000443	LBX2	85474	CLASH	23622248	Unspecified
hsa-mir-125a-5p	MIMAT0000443	SLFN11	91607	CLASH	23622248	Unspecified
hsa-mir-125a-5p	MIMAT0000443	ASB16	92591	HITS-CLIP	23313552|27418678	Unspecified
hsa-mir-125a-5p	MIMAT0000443	ARHGAP12	94134	CLASH	23622248	Unspecified
hsa-mir-125a-5p	MIMAT0000443	TP53INP1	94241	PAR-CLIP	22100165|24398324	Unspecified
hsa-mir-125a-5p	MIMAT0000443	CASC4	113201	CLASH	23622248	Unspecified
hsa-mir-125a-5p	MIMAT0000443	OSBPL9	114883	CLASH	23622248	Unspecified
hsa-mir-125a-5p	MIMAT0000443	OMA1	115209	Sequencing	20371350	Unspecified
hsa-mir-125a-5p	MIMAT0000443	ZMYND19	116225	CLASH	23622248	Unspecified
hsa-mir-125a-5p	MIMAT0000443	ANAPC16	119504	PAR-CLIP	21572407	Unspecified
hsa-mir-125a-5p	MIMAT0000443	EMID1	129080	CLASH	23622248	Unspecified
hsa-mir-125a-5p	MIMAT0000443	GPAT4	137964	HITS-CLIP	19536157	Unspecified
hsa-mir-125a-5p	MIMAT0000443	E2F7	144455	Sequencing	20371350	Unspecified
hsa-mir-125a-5p	MIMAT0000443	C2orf15	150590	HITS-CLIP	23824327	Unspecified
hsa-mir-125a-5p	MIMAT0000443	TTC30B	150737	CLASH	23622248	Unspecified
hsa-mir-125a-5p	MIMAT0000443	SLC35G1	159371	PAR-CLIP	20371350	Unspecified
hsa-mir-125a-5p	MIMAT0000443	TOR1AIP2	163590	CLASH	23622248	Unspecified
hsa-mir-125a-5p	MIMAT0000443	LONRF2	164832	PAR-CLIP	22012620	Unspecified
hsa-mir-125a-5p	MIMAT0000443	SPATA5	166378	PAR-CLIP	21572407|20371350	Unspecified
hsa-mir-125a-5p	MIMAT0000443	NBPF11	200030	PAR-CLIP	24398324	Unspecified
hsa-mir-125a-5p	MIMAT0000443	NAIF1	203245	Luciferase reporter assay//qRT-PCR//Western blot	26719710	Unspecified
hsa-mir-125a-5p	MIMAT0000443	TMEM136	219902	PAR-CLIP	23446348	Unspecified
hsa-mir-125a-5p	MIMAT0000443	KIF6	221458	CLASH	23622248	Unspecified
hsa-mir-125a-5p	MIMAT0000443	PLA2G4F	255189	CLASH	23622248	Unspecified
hsa-mir-125a-5p	MIMAT0000443	NEGR1	257194	HITS-CLIP	23824327	Unspecified
hsa-mir-125a-5p	MIMAT0000443	SEC14L3	266629	PAR-CLIP	22100165	Unspecified
hsa-mir-125a-5p	MIMAT0000443	HID1	283987	HITS-CLIP	23824327	Unspecified
hsa-mir-125a-5p	MIMAT0000443	ZNF776	284309	Sequencing	20371350	Unspecified
hsa-mir-125a-5p	MIMAT0000443	PPP1R37	284352	PAR-CLIP	21572407	Unspecified
hsa-mir-125a-5p	MIMAT0000443	GJB7	375519	HITS-CLIP	23824327|19536157	Unspecified
hsa-mir-125a-5p	MIMAT0000443	LIN28B	389421	CLASH	23622248	Unspecified
hsa-mir-125a-5p	MIMAT0000443	FAM174B	400451	HITS-CLIP	23824327	Unspecified
hsa-mir-125a-5p	MIMAT0000443	CENPP	401541	PAR-CLIP	20371350	Unspecified
hsa-mir-125a-5p	MIMAT0000443	GOLGA8B	440270	PAR-CLIP	23446348|21572407|20371350	Unspecified
hsa-mir-125a-5p	MIMAT0000443	ANKRD33B	651746	PAR-CLIP	21572407	Unspecified
